# 1 **Demographic and genetic factors shape the epitope specificity of the human** 2 **antibody repertoire against viruses**

3

4 Axel Olin<sup>1,2,\*</sup>, Anthony Jaquaniello<sup>1,3</sup>, Maguelonne Roux<sup>1,4,13</sup>, Ziyang Tan<sup>5</sup>, Christian Pou<sup>5</sup>,  
5 Florian Dubois<sup>6,7</sup>, Bruno Charbit<sup>6,7</sup>, Dang Liu<sup>1</sup>, Emma Bloch<sup>8</sup>, Emmanuel Clave<sup>9</sup>, Itauá Leston  
6 Araujo<sup>9</sup>, Antoine Toubert<sup>9</sup>, Michael White<sup>8</sup>, Maxime Rotival<sup>1</sup>, Petter Brodin<sup>5,10</sup>, Darragh  
7 Duffy<sup>6,7</sup>, Lluís Quintana-Murci<sup>1,11,12,\*</sup>, Etienne Patin<sup>1,12,\*</sup>, Milieu Intérieur Consortium

8

9 <sup>1</sup>Human Evolutionary Genetics Unit, Institut Pasteur, Université Paris Cité, CNRS UMR2000,  
10 75015 Paris, France

11 <sup>2</sup>Division of Micro and Nanosystems, School of Electrical Engineering and Computer Science,  
12 KTH Royal Institute of Technology, 100 44 Stockholm, Sweden

13 <sup>3</sup>Data Management Platform, Institut Pasteur, 75015 Paris, France

14 <sup>4</sup>Bioinformatics and Biostatistics Hub, Institut Pasteur, Université Paris Cité, 75015 Paris, France

15 <sup>5</sup>Department of Women's and Children's Health, Karolinska Institutet, 17165 Solna, Sweden

16 <sup>6</sup>Translational Immunology Unit, Department of Immunology, Institut Pasteur, Université Paris  
17 Cité, 75015 Paris, France

18 <sup>7</sup>Single Cell Biomarkers UTechS, Institut Pasteur, Université Paris Cité, 75015 Paris, France

19 <sup>8</sup>Infectious Disease Epidemiology and Analytics Unit, Institut Pasteur, Université Paris Cité,  
20 75015 Paris, France

21 <sup>9</sup>Institut de Recherche Saint Louis, EMIly, INSERM UMR\_S1160, Université Paris Cité, 75010  
22 Paris, France

23 <sup>10</sup>Department of Immunology and Inflammation, Imperial College London, SW7 2AZ London,  
24 UK

25 <sup>11</sup>Chair Human Genomics and Evolution, Collège de France, 75005 Paris, France

26 <sup>12</sup>These authors contributed equally

27 <sup>13</sup>Deceased

28 \*e-mail: [axelolin@kth.se](mailto:axelolin@kth.se) (A.O.); [quintana@pasteur.fr](mailto:quintana@pasteur.fr) (L.Q.M.); [epatin@pasteur.fr](mailto:epatin@pasteur.fr) (E.P.)

29

30 **Antibodies are central to immune defenses. Despite advances in understanding the**  
31 **mechanisms of antibody generation, a comprehensive model of how intrinsic and external**  
32 **factors shape human humoral responses to viruses is lacking. Here, we apply PhIP-Seq to**  
33 **investigate the effects of demographic and genetic factors on antibody reactivity to more**  
34 **than 97,000 viral peptides in 1,212 healthy adults. We demonstrate that age, sex, and**  
35 **continent of birth extensively influence the viruses and viral epitopes targeted by the**  
36 **human antibody repertoire. Among 108 lifestyle and health-related variables, smoking**  
37 **exerts the strongest, yet reversible, impact on antibody profiles, primarily against**  
38 **rhinoviruses. Additionally, we identify strong associations between antibodies against 34**  
39 **viruses and genetic variants at *HLA*, *FUT2*, *IGH*, and *IGK* genes, some of which increase**  
40 **autoimmune disease risk. These findings offer a valuable resource for understanding the**  
41 **factors affecting antibody-mediated immunity, laying the groundwork for optimizing**  
42 **vaccine strategies.**

43  
44 Antibodies are essential effectors of humoral immunity and serve as correlates of protection  
45 following vaccination or natural infection. The cellular and molecular processes underlying  
46 antibody production and maintenance are thought to depend on diverse factors that collectively  
47 shape the strength and longevity of the antibody repertoire. Family- and population-based studies  
48 have uncovered marked differences in antibody titers with sex and age. For example, women  
49 often exhibit higher titers against human papillomavirus (HPV)<sup>1</sup> and Epstein-Barr virus (EBV)<sup>1,2</sup>  
50 and generally mount stronger vaccine responses than men<sup>3</sup>. Furthermore, antibodies against  
51 persistent herpesviruses like herpes simplex virus 1 (HSV-1) and cytomegalovirus (CMV) tend  
52 to increase with age, reflecting cumulative exposure<sup>1,2,4,5</sup>. In contrast, antibodies against viruses  
53 that primarily infect children (e.g., respiratory syncytial virus (RSV) and varicella-zoster virus  
54 (VZV)) or those included in immunization schedules (e.g., measles, mumps, and rubella viruses)  
55 typically persist at high levels in most adults<sup>1,2</sup>. Other non-genetic factors associated with  
56 antibody levels include socioeconomic status<sup>1,2</sup> and smoking<sup>4</sup>.

57 Human genetic factors also affect antibody production. Total and virus-specific antibody  
58 titers against CMV, EBV, and influenza A virus (IAV) have been shown to be heritable<sup>2,6-9</sup>. At  
59 the genome-wide scale, the *HLA* locus presents strong associations with antibody titers against  
60 EBV, hepatitis B virus (HBV), VZV, and molluscum contagiosum virus<sup>2,10-16</sup>. Other loci,

61 including *IGH*, *STING1*, and *FUT2*, have been associated with antibodies targeting IAV and  
62 norovirus<sup>4,17</sup>.

63 Despite advancements in characterizing the determinants of the antiviral antibody response,  
64 most studies have focused on a limited number of viruses, hindering a comprehensive  
65 understanding of humoral immunity across the broad spectrum of viruses infecting humans<sup>18</sup>.  
66 Furthermore, while antibodies targeting a single virus can recognize numerous epitopes – the  
67 portion of an antigen recognized by the immune system – variability in epitope reactivity among  
68 individuals infected with the same virus remains poorly understood. Factors such as ethnicity<sup>19</sup>  
69 and age<sup>20</sup> have been suggested to influence this variability, but the determinants of inter-  
70 individual differences in viral antigenic specificity are yet to be discovered.

71 In this study, we delineate the extent and drivers of variation in the epitope-specific antiviral  
72 antibody repertoire in humans using phage immunoprecipitation sequencing (PhIP-seq), a high-  
73 throughput method for assessing antibody-epitope interactions<sup>21,22</sup>. PhIP-seq has been used to  
74 characterize antibody repertoire changes across various diseases<sup>5,23</sup> and to evaluate humoral  
75 immunity against bacteria and food allergens<sup>4,24–26</sup>. A virus-specific PhIP-seq implementation,  
76 VirScan<sup>27</sup>, which spans the complete peptidome of all known human viruses, has recently  
77 allowed to investigate the impact of measles infection on antibody profiles<sup>28</sup>, immune  
78 development in neonates<sup>29</sup>, and immunodominant epitopes<sup>30,31</sup>. Here, we applied the VirScan  
79 phage library to profile over 97,000 viral peptides in 1,212 healthy adults and integrated this  
80 information with comprehensive demographic, lifestyle, and genetic data. This approach enabled  
81 us to characterize differences in the viruses, viral proteins, and epitopes targeted by individual  
82 antibody profiles and to identify key factors shaping the natural breadth and epitope specificity of  
83 the human antibody repertoire against viruses.

84

## 85 **Results**

### 86 **Extensive diversity in the antiviral antibody repertoire of healthy adults**

87 To assess the virome-wide antibody repertoire, we performed PhIP-seq on 900 plasma samples  
88 from the *Milieu Intérieur* (MI) cohort<sup>32</sup>, comprising individuals of European ancestry with a  
89 balanced distribution of sex and age (20-69 years; Fig. 1a). To validate findings from the MI  
90 cohort and explore population differences in humoral responses, we also applied PhIP-seq to 312  
91 samples from the EvoImmunoPop (EIP) cohort<sup>33</sup>, comprising 100 and 212 Belgian residents

92 born in either Central Africa or Europe, respectively, all male and aged 20 to 50 years (Fig. 1b).  
93 For both cohorts, we used the VirScan V3 library, encompassing 115,753 56-amino-acid-long  
94 peptide sequences<sup>27</sup>. After filtering for unique viral sequences, we obtained a final set of 97,978  
95 peptides representing a wide range of viral families and species (Extended Data Fig. 1a,b). PhIP-  
96 seq read counts for each viral peptide were then converted into standardized Z-scores (Methods),  
97 which measure peptide-antibody interactions and have been shown to correlate strongly with  
98 antibody titers<sup>27</sup>.

99 The total number of positive peptides per individual was normally distributed (Fig. 1c,d,f,g),  
100 averaging 881 and 1,044 peptides for MI and EIP individuals, respectively, due to differences in  
101 cohort demographics, sampling protocols, or experimental batch effects (Methods).  
102 Approximately 97% of peptides were positive in < 5% of individuals, reflecting individual-  
103 specific immunity (denoted *private* peptides) or false positives (Fig. 1e,h), consistent with  
104 previous reports<sup>4,24,26</sup>. As a result, we conducted all subsequent analyses on peptides positive in >  
105 5% of individuals, with at least two peptides being positive from the same virus (denoted *public*  
106 peptides). In total, we identified 2,608 public peptides in MI and 3,210 in EIP, originating from  
107 113 viral species, with EBV, IAV, and enterovirus B being the most prevalent in both cohorts  
108 (Extended Data Fig. 1c).

109 When investigating the reactivity of thousands of peptides simultaneously, the risk of cross-  
110 reactivity must be considered, as it can lead to false positives. To address this, we used the  
111 AVARDA algorithm, which estimates the probability of antibody reactivity per virus species,  
112 accounting for sequence alignment between peptides and library peptide representation<sup>34</sup>. As  
113 expected, seroprevalence determined by AVARDA was highest for common viruses such as  
114 EBV, HSV-1, CMV, rhinoviruses A and B, and adenovirus C in both cohorts (Fig. 1i). We  
115 validated the resolution, sensitivity, and serostatus prediction accuracy of both peptide-level Z-  
116 scores and virus-level AVARDA breadth scores through comparison with ELISA and Luminex  
117 assays (Methods; Supplementary Note; Supplementary Figs. 1 and 2; Table S1). Together, these  
118 analyses underscore the specificity and sensitivity of PhIP-seq results and reveal the extensive  
119 diversity of the human antibody repertoire targeting viruses causing common infections.

120

121 **Age and sex affect the breadth and epitope specificity of the antibody repertoire**

122 Given the complementarity of peptide-level and AVARDA-based approaches (Supplementary  
123 Note), we explored the effects of non-genetic and genetic factors on antibody reactivity using  
124 peptide-level Z-scores and then verified whether the AVARDA breadth score for the  
125 corresponding virus was associated with the same factors. We first examined the effects of age  
126 and sex on the antiviral antibody repertoire, represented by the 2,608 public peptides and 132  
127 AVARDA scores in the MI cohort. As no significant non-linear effects of age or age  $\times$  sex  
128 interactions were observed, we only considered linear effects of age and sex (Methods). Linear  
129 regression modeling revealed that age is strongly associated with antibody reactivity against a  
130 broad range of viruses (Fig. 2a), in line with previous studies<sup>4,5</sup>.

131 Antibodies against 565 peptides significantly increased with age, primarily from  
132 herpesviruses HSV-1, HSV-2, and EBV, which can reactivate throughout life<sup>35</sup>. These  
133 associations were not due to cross-reactivity, as supported by AVARDA (Extended Data Fig.  
134 2a), and were replicated in the EIP cohort for HSV-1 and EBV (Extended Data Fig. 2b-d). The  
135 strongest age effects were observed for antibodies targeting the US6 gene product of HSV-1, the  
136 surface protein glycoprotein D (Extended Data Fig. 2e), as well as various EBV proteins  
137 including EBNA-3, -4, and -6 (Extended Data Fig. 2f). Both peptide-level Z-scores and  
138 AVARDA breadth scores also showed positive associations with age for hepatitis A virus (HAV)  
139 and aichi virus A (Fig. 2a and Extended Data Fig. 2a), the latter being a kobuvirus initially  
140 isolated during a 1989 gastroenteritis outbreak in Japan that has subsequently been detected in  
141 Europe<sup>36,37</sup>. Conversely, antibodies against 766 peptides significantly decrease with age,  
142 primarily involving rhinoviruses, enteroviruses, and adenoviruses (Fig. 2a). After accounting for  
143 cross-reactivity with AVARDA, antibodies against rhinoviruses A and B, enterovirus B and C,  
144 and adenovirus D showed a significant decrease with age (Extended Data Fig. 2a), suggesting  
145 higher exposure in younger individuals and/or faster antibody waning in older adults.

146 Interestingly, antibodies against different IAV peptides strongly increase or decrease with  
147 age (Fig. 2a,b). Antibodies from younger individuals primarily target amino acid positions 1-100  
148 and 300-400 of hemagglutinin (HA), which are part of the highly antigenic globular head of  
149 HA<sup>38</sup>, whereas older individuals preferentially target positions 450-550, which are part of the HA  
150 stalk domain (Fig. 2c-e). A similar pattern was observed for the IAV matrix protein 1 (MP1),  
151 with younger individuals more frequently targeting positions 200-250 and older individuals  
152 targeting positions 150-200 (Fig. 2f,g). These differences were not driven by age-related

153 variations in exposure to different IAV subtypes, as both positive and negative associations were  
154 observed within the same IAV subtypes for HA and MP1 (Fig. 2c,f). Furthermore, although past  
155 flu vaccination was associated with higher total anti-IAV antibody titers in the MI cohort ( $P =$   
156  $2.07 \times 10^{-14}$ ), age was only weakly associated with vaccination (logistic regression  $P = 0.033$ ),  
157 supporting the view that vaccination does not contribute to the observed patterns. Notably, the  
158 AVARDA breadth score for IAV was not associated with age (Extended Data Fig. 2a), as it  
159 aggregates peptides with opposite age effects (Methods). Together, these results indicate that  
160 epitope specificity of anti-IAV humoral responses varies with age.

161 The effects of sex on the antibody repertoire were moderate compared to those of age: 330  
162 peptides showed significantly higher antibody levels in women and 236 in men (Extended Data  
163 Fig. 3a). While associated peptides originated from various viruses, AVARDA analysis  
164 supported higher reactivity in women for antibodies against CMV, HHV-6A, and HHV-6B  
165 (Extended Data Fig. 3b). These results suggest that women have higher exposure and/or stronger  
166 humoral responses to herpesviruses compared to men, in contrast to bacterial infections, which  
167 affect the antibody levels similarly in both sexes<sup>4</sup>. We observed that antibodies of women and  
168 men tend to target different IAV and IBV proteins, with women more often targeting the HA  
169 protein (Extended Data Fig. 3c,d). Given the similar flu vaccination rates between women and  
170 men in the MI cohort (20.2% vs. 18.6%, respectively; logistic regression  $P = 0.51$ ), these  
171 findings suggest inherent sex differences in humoral responses against influenza viruses.

172

### 173 **Antibody profiles markedly differ according to population of origin**

174 To investigate how geographical differences in pathogen exposure affect the antiviral antibody  
175 repertoire, we leveraged the EIP cohort, comprising individuals born in Central Africa (AFB) or  
176 Europe (EUB). While all samples were collected in Belgium, AFB had relocated to Europe  
177 shortly before sample collection (2.45 years before, on average<sup>39</sup>), implying that differences with  
178 EUB may reflect variations in early-life exposures and/or genetic ancestry. We observed marked  
179 population differences in antibody repertoires (Fig. 3a). Specifically, antibody levels against 898  
180 viral peptides were increased in EUB, predominantly from rhinoviruses, adenoviruses, and IAV  
181 ( $P_{\text{adj}} < 0.05$ ), although significance was weak when considering the AVARDA scores ( $P_{\text{adj}} >$   
182  $0.001$ ). In contrast, higher antibody reactivity in AFB was observed for 647 peptides, of which  
183 61% were related to herpesviruses. The higher reactivity of AFB to herpesviruses was strongly

184 supported by AVARDA for antibodies against CMV ( $P_{\text{adj}} = 1.29 \times 10^{-19}$ ), HHV-6A ( $P_{\text{adj}} = 6.18$   
185  $\times 10^{-17}$ ), HHV-6B ( $P_{\text{adj}} = 1.34 \times 10^{-10}$ ), and HHV-8 ( $P_{\text{adj}} = 6.93 \times 10^{-20}$ ) (Extended Data Fig. 4a),  
186 confirming previous studies<sup>33,40,41</sup>. Notably, anti-HHV-8 antibodies were significantly higher in  
187 AFB for 68 out of 70 peptides (Extended Data Fig. 4b). Similarly, reactivity against 108 out of  
188 123 CMV peptides was greater in AFB, with the most significant antibodies targeting RL12,  
189 UL32/pp150, and UL139 (Extended Data Fig. 4c).

190 Antibody reactivity also differed between populations for epitopes from the same virus  
191 species. While overall reactivity to EBV was similar between AFB and EUB ( $P_{\text{adj}} > 0.05$ ;  
192 Extended Data Fig. 4a), the two groups targeted different EBV peptides (Fig. 3a). Antibodies  
193 from AFB more frequently targeted the viral protein EBNA-4, whereas those from EUB  
194 preferentially targeted EBNA-6 (Fig. 3b,e). The four EBNA-4 peptides most associated with  
195 African origin are located between amino acid positions 600-800 and derive from the AG876  
196 strain, a type-2 EBV strain prevalent in Africa<sup>42</sup> (Fig. 3b-d). Conversely, EBNA-6 peptides  
197 associated with European origin are found between amino acid positions 750-850 and derive  
198 from the GD1 and B95-8 cosmopolitan strains (Fig. 3e-g). These findings suggest that  
199 differences in epitope specificity between populations likely result from past exposure to  
200 different EBV strains. Similarly, antibodies against IAV from AFB primarily targeted NP from  
201 H1N1, whereas those from EUB favored HA from H3N2 (Extended Data Fig. 4d-f).  
202 Collectively, these results reveal population disparities in antibody reactivity against epitopes of  
203 common viruses, highlighting the limitation of using single antigens to assess seroprevalence in  
204 global epidemiological studies.

## 205 206 **Smoking exerts strong yet reversible effects on antibody reactivity against rhinoviruses**

207 To gain a more comprehensive understanding of the effects of non-genetic factors on the  
208 antiviral antibody repertoire, we leveraged the MI cohort to search for associations with a  
209 curated list of 108 variables assessing socio-economic status (SES), health-related habits,  
210 medical history, and disease-related biomarkers, while controlling for age and sex (Table S2,  
211 Methods). Besides weak associations with SES and a few health biomarkers (Fig. 4a; Table S3;  
212 Supplementary Note), the only strongly significant associations were found for tobacco smoking,  
213 which was associated with 134 peptides (Fig. 4a,b), primarily from rhinoviruses A and B and  
214 enteroviruses A-D. AVARDA analysis confirmed the significant association between cigarette

215 consumption and antibodies targeting rhinoviruses A and B ( $P_{adj} = 1.99 \times 10^{-4}$ ). Rhinoviruses are  
216 prevalent causes of the common cold, which is more frequent and severe in smokers, although  
217 the underlying physiological mechanisms are debated<sup>43,44</sup>.

218 The peptide most significantly associated with smoking originates from a rhinovirus B  
219 polyprotein containing capsid proteins, with antibody levels against it showing a large increase in  
220 smokers ( $P_{adj} = 3.24 \times 10^{-10}$ ; Fig. 4c). We found that anti-rhinovirus B reactivity was not  
221 associated with smoking duration in active smokers ( $P = 0.454$ ) (Fig. 4d), suggesting constant,  
222 non-cumulative exposure to rhinoviruses. Interestingly, ex-smokers exhibited similar levels of  
223 reactivity compared to individuals who never smoked ( $P = 0.059$ ; Fig. 4c). Accordingly, anti-  
224 rhinovirus B antibodies decreased with years after quitting smoking in former smokers ( $P = 5.97$   
225  $\times 10^{-3}$ ; Fig. 4e). These findings collectively indicate that smoking exerts a strong, yet reversible,  
226 effect on the antibody repertoire against rhinoviruses.

227

### 228 **Germline variants in immunoglobulin genes shape the antiviral antibody repertoire**

229 To identify genetic factors affecting the antiviral antibody repertoire, we conducted a GWAS of  
230 Z-scores for the 2,608 public peptides in the MI cohort, by testing for associations with  
231 5,699,237 imputed common SNPs<sup>45</sup> while controlling for age, sex, and genetic structure  
232 (Methods). The EIP cohort served as a replication cohort. Given the incomplete coverage of B-  
233 cell receptor loci by the imputed SNPs, we performed next-generation sequencing of the *IGH*,  
234 *IGK*, and *IGL* genes in all MI donors at a ~35× depth of coverage, generating an additional  
235 30,503 common variants (Methods). We detected strong genome-wide significant associations  
236 for 225 viral peptides at four independent loci, including *HLA*, *FUT2*, *IGH*, and *IGK* genes (Fig.  
237 5a; Tables 1 and S4).

238 We found significant associations between *HLA* variants and antibody reactivity against 112  
239 peptides from 15 viruses, including EBV, HSV-1, and adenoviruses A-F, consistent with prior  
240 studies<sup>2,4,10,11,14-16</sup> and replicated in the EIP cohort ( $P_{rep} < 0.05$ ; Tables 1 and S4). To account for  
241 linkage disequilibrium (LD) among *HLA* variants and enable comparisons with previous disease  
242 studies, we imputed *HLA* alleles from genotype data and tested for associations between peptide  
243 Z-scores and allele dosages (Methods). This analysis revealed 85 associations (Table S5),  
244 including *HLA-DRBI*\*04 and *HLA-DQAI*\*03:01 with adenovirus peptides ( $P < 2.3 \times 10^{-15}$ ; Fig.  
245 5b,c) and *HLA-DRBI*\*13 with EBV peptides ( $P = 7.5 \times 10^{-19}$ ; Fig. 5d). Notably, these alleles



246 have previously been associated with increased risk for type 1 diabetes and rheumatoid  
247 arthritis<sup>46</sup>, providing a potential explanation for the link between these immune diseases and  
248 EBV and adenovirus infections<sup>47–49</sup>.

249 Variants near *FUT2* were associated with antibodies against norovirus peptides ( $P = 1.10 \times$   
250  $10^{-10}$ ; Extended Data Fig. 5a). Mutations in *FUT2* determine the non-secretor phenotype, which  
251 is known to confer resistance to norovirus infection<sup>50</sup> and susceptibility to type 1 diabetes and  
252 inflammatory bowel disease<sup>51,52</sup>. The most significant variants include rs601338 ( $P = 2.01 \times 10^{-$   
253  $10$ ), the *FUT2* stop mutation that commonly determines the non-secretor status<sup>53</sup>, the protective  
254 allele being associated with lower anti-norovirus antibody levels. Variants in strong LD with  
255 rs601338 also showed significant associations in the EIP cohort ( $P_{\text{rep}} = 5.98 \times 10^{-9}$ ;  $r^2 = 0.998$ ).  
256 Additionally, we identified a novel association between variants in near-complete LD ( $r^2 =$   
257  $0.995$ ) with rs601338 and antibodies against two salivirus strains in both the MI ( $P < 1.58 \times 10^{-$   
258  $14$ ) and EIP ( $P_{\text{rep}} < 1.36 \times 10^{-10}$ ) cohorts (Extended Data Fig. 5b). Saliviruses, first discovered in  
259 2009 in diarrheal samples, are known to cause gastroenteritis<sup>54</sup>, although their target cells and  
260 entry mechanisms remain unknown. The associations between the *FUT2* non-secretor status and  
261 anti-salivirus antibodies are unlikely to result from cross-reactivity with norovirus peptides, as  
262 their respective *Z*-scores were not correlated (Extended Data Fig. 5c,d).

263 Genetic variation within the *IGH* locus was associated with 107 peptides from 21 viruses  
264 (Fig. 5a; Tables 1 and S4). This genomic region encodes the heavy chain of the antibody  
265 molecule and has previously been associated with antibody levels against various bacteria, as  
266 well as IAV and norovirus<sup>4</sup>. Our analyses expanded these findings, by identifying new  
267 associations with herpesviruses (HSV-2, EBV, CMV, HHV-6), RSV, IAV, HBV, coronavirus  
268 NL63, rubella virus, sandfly fever Sicilian virus, enteroviruses, and rhinoviruses. Interestingly,  
269 several newly identified GWAS variants influence *IGHV* clonal gene usage by V(D)J somatic  
270 recombination, assessed by AIRR-sequencing in a previous study<sup>55</sup>. For example, we found that  
271 a variant associated with antibodies against the rubella virus (rs1024350,  $P = 1.90 \times 10^{-11}$ ) and  
272 suggestively associated with IAV ( $P = 5.38 \times 10^{-10}$ ) affects *IGHV1-69* usage<sup>55</sup> ( $P = 1.14 \times 10^{-16}$ ).  
273 *IGHV1-69* usage is known to partially determine the quality of anti-influenza antibodies<sup>56</sup>.  
274 Another variant, rs9671760, which we found associated with antibodies against the rubella virus  
275 ( $P = 3.34 \times 10^{-14}$ ; Fig 5e) and the sandfly fever Sicilian virus ( $P = 1.46 \times 10^{-11}$ ; Fig 5f), regulates  
276 *IGHV3-64* usage<sup>55</sup> ( $P = 1.32 \times 10^{-8}$ ).

277 The fourth genome-wide significant locus revealed a novel association between *IGK*, which  
278 encodes the  $\kappa$  light chain of antibodies, and antibody levels targeting adenovirus B peptides ( $P =$   
279  $1.51 \times 10^{-23}$ ) (Extended Data Fig. 5e). Together, these findings underscore the broad impact of  
280 host genetic factors, including germline mutations in immunoglobulin genes, on humoral  
281 immune responses to multiple viruses.

282

### 283 **Demographic and genetic factors differentially affect reactivity across viral epitopes**

284 Finally, to assess the relative contributions of demographic (non-genetic) and genetic factors to  
285 the antibody repertoire, we estimated the proportion of variance explained by age, sex, smoking,  
286 and GWAS lead variants for the 2,608 public peptides. Together, these factors explained an  
287 average of 7.39% (range: [0.91% – 25.50%]) of inter-individual variation in antibody reactivity  
288 (Fig 6a). Demographic factors explained 3.81% (range: [0.007% – 20.68%]) of the variance,  
289 while genetic factors contributed to 3.44% (range: [0.48% – 23.02%]). These proportions varied  
290 substantially across viruses, consistent with earlier findings (Extended Data Fig. 6a,b). For  
291 example, antibody levels against rhinovirus peptides were predominantly affected by age (Fig.  
292 2a), those against CMV by sex (Extended Data Fig. 3a), and those against EBV by genetic  
293 variation (Table 1).

294 We also observed substantial variation in the factors explaining the variance of peptide Z-  
295 scores within the same virus. For example, the variance of antibody reactivity to the HA protein  
296 of IAV was predominantly explained by age, whereas anti-M1 antibodies were primarily  
297 affected by *IGH* genetic variation (Extended Data Fig. 6c). Similarly, anti-EBV antibodies  
298 targeting the EBNA-5 protein were strongly influenced by *HLA* genotypes, while those targeting  
299 EBNA-4 and tegument proteins varied primarily because of age (Extended Data Fig. 6d).  
300 Interestingly, a similar pattern was observed for anti-RSV antibodies, but at the level of a single  
301 protein: antibodies against different peptides of the immunogenic glycoprotein G<sup>57</sup> were  
302 associated with either age or *IGH* genetic variants (Fig 6b). Age-associated peptides originate  
303 from RSV strain A, while *IGH*-associated peptides originate from strain B — two phylogenetic  
304 RSV lineages that differ substantially in the protein G sequence<sup>58</sup> (Fig. 6c). Specifically, age-  
305 associated antibodies primarily targeted amino acid positions 150-200 of protein G in RSV-A  
306 (Fig 6d), a pattern confirmed in the EIP cohort (Extended Data Fig. 6e) and a previous study<sup>59</sup>. In  
307 contrast, *IGH*-associated antibodies were predominantly directed at positions 225-275 of RSV-B

308 (Fig 6d), indicating strain- and position-specific genetic effects. Overall, these findings indicate  
309 that the effects of non-genetic and genetic factors largely differ among viruses, viral strains,  
310 proteins, and epitopes targeted by the human antibody repertoire.

311

## 312 **Discussion**

313 In this study, we generated a comprehensive dataset of blood plasma antibody levels against  
314 more than 97,000 viral peptides, providing a valuable resource to investigate the factors —  
315 intrinsic, environmental, and genetic — that affect the antibody repertoire in healthy adults. All  
316 results can be explored via a dedicated web-based browser (<http://mirepertoire.pasteur.cloud/>).  
317 Among these factors, age had the most profound and widespread effect on antibody reactivity.  
318 Age-related increases in antibody response may reflect cumulative exposure in older adults (e.g.,  
319 HAV and aichi virus A), reactivation of latent viruses (e.g., HSV-1, HSV-2, EBV, and CMV), or  
320 reinfections by viruses causing recurrent infections (e.g., IAV, IBV, and RSV). Conversely, age-  
321 related decreases may reflect higher exposure during young adulthood and rapid antibody  
322 waning (e.g., rhinoviruses A-C and enteroviruses B and C).

323 Importantly, our study reveals that aging is associated with differential epitope recognition  
324 for the same viral protein. Anti-IAV antibodies of younger and older adults target different  
325 domains of the same IAV proteins, a phenomenon observed across IAV subtypes and for the  
326 IAV M1 protein, which is not typically targeted by flu vaccines. This suggests that the observed  
327 differences are not solely attributable to age-related disparities in natural or vaccine-induced  
328 exposure to diverse viral strains. Alternatively, certain structural domains of viral proteins may  
329 be less accessible to antibodies, necessitating multiple reinfections to elicit antibodies against  
330 them. This hypothesis has been proposed to explain age-related differences in neutralizing  
331 antibody titers against the globular head and stalk domains of the IAV HA protein<sup>60,61</sup>. We  
332 propose that age-dependent antigenic specificity, observed here for the first time across several  
333 IAV proteins, may be more widespread than previously recognized. Similarly, we show that sex  
334 influences epitope specificity, with women's antibodies preferentially targeting the HA protein  
335 of IAV and IBV, relative to men, while men's antibodies disproportionally target NP and M1.  
336 Further studies are needed to elucidate the underlying mechanisms and their implications for  
337 age- and sex-related differences in the risk of influenza infection and vaccine response.

338 Antibody profiles also vary markedly according to the continent of birth, likely due to  
339 differences in viral exposure<sup>27</sup>. We observed that antibodies from individuals born in Central  
340 Africa or Europe target different EBV proteins, suggesting that regional variations in EBV  
341 strains<sup>33,34</sup> contribute to population differences in antibody responses at the epitope level. Among  
342 the environmental factors affecting the antibody repertoire, we identified a strong association  
343 between smoking and anti-rhinovirus antibodies, consistent with the higher risk of smokers for  
344 the common cold compared to non-smokers. Notably, we observed similar antibody levels  
345 against rhinoviruses in ex-smokers and never-smokers, indicating that altered viral clearance  
346 and/or heightened exposure in smokers is reversible upon smoking cessation.

347 Finally, our GWAS confirms that *HLA* and *IGH* affect antibody levels against a range of  
348 viruses<sup>2,4,10,11,14-16</sup>, and largely expands the list of associated viruses, by revealing novel  
349 associations with herpesviruses 2-6, RSV, HBV, rhinoviruses, enteroviruses, coronavirus N63,  
350 and rubella virus. Sequencing of the immunoglobulin genes was critical in discovering  
351 associations with the *IGH* locus, as well as the new association with *IGK*, since SNP arrays do  
352 not cover these complex regions. We also identified a strong association between antibodies  
353 against the recently discovered and poorly understood saliviruses and *FUT2*, a gene previously  
354 linked to norovirus infection, suggesting that saliviruses may utilize similar infection  
355 mechanisms as noroviruses.

356 Several genetic variants identified in our study as associated with increased humoral  
357 responses against viruses have previously been linked to higher risk of autoimmune  
358 diseases<sup>46,51,52</sup>. Patients with these diseases often show higher seroprevalence for common  
359 viruses, leading previous studies to suggest a causal role of these viral infections in  
360 autoimmunity<sup>47-49</sup>. However, our results suggest that associations between autoimmune  
361 conditions and antibody levels against viruses may instead result from a shared genetic etiology  
362 that affects both traits independently. Furthermore, our study supports the hypothesis of  
363 antagonistic pleiotropy, which posits that variants that once conferred resistance to infection now  
364 increase the risk for non-infectious immune diseases<sup>63</sup>. Consistent with this, the *HLA* and *FUT2*  
365 alleles associated with antiviral humoral responses have increased in frequency under natural  
366 selection in Europe over the past millennia<sup>64</sup>. Detailed sequencing-based studies in large  
367 biobanks are now required to determine the role of genetic variation in shaping the antibody  
368 repertoire in immune disorders.

369 This study has several limitations. First, while the VirScan library offers broad coverage, it is  
370 limited to linear peptides, potentially overlooking antibodies that bind to conformational  
371 epitopes. Additionally, antibody cross-reactivity between peptides introduces uncertainty in  
372 attributing results to specific viruses. We mitigated this risk by using AVARDA, although this  
373 method may also lead to false negatives. The extensive number of tests required to evaluate the  
374 entire peptide library, combined with the cohort size, may further increase false negatives.  
375 Lastly, the PhIP-seq approach does not differentiate between neutralizing and non-neutralizing  
376 antibodies, which would require large-scale experimental studies. Despite these challenges, our  
377 study provides high-resolution insights into the widespread effects of age, sex, continent of birth,  
378 smoking, and genetics on the antibody repertoire. Crucially, it also uncovers how these factors  
379 differentially affect antibodies targeting specific epitopes within the same virus or viral protein,  
380 deepening our understanding of antibody generation and maintenance processes. We anticipate  
381 that our dataset and findings will prompt novel mechanistic studies of antiviral immunity, with  
382 the potential to advance vaccine and therapeutic strategies.

383

## 384 **Acknowledgments**

385 We acknowledge the help of the HPC Core Facility of Institut Pasteur for this work. A.O. was  
386 supported by a grant from the Wenner-Gren Foundation. This work received funding from the  
387 French government's program 'Investissement d'Avenir,' managed by the *Agence Nationale de*  
388 *la Recherche* (reference 10-LABX-69-01).

389

## 390 **Author contributions**

391 A.O., L.Q.-M., and E.P. conceived and developed the study. F.D. and B.C. prepared DNA  
392 samples. Z.T., C.P., and P.B. acquired VirScan data. D.D. and P.B. advised on experiments. E.B.  
393 and M.W. generated the Luminex-based serology data. E.C., I.L.A., and A.T. generated the  
394 Kappa-deleting recombination excision circles (KREC) data. A.O. performed all analyses, with  
395 contributions from A.J., M.R., D.L. and E.P. A.J. developed predictive algorithms. E.P.  
396 supervised analyses. A.O. and E.P. wrote the manuscript, with input from L.Q.-M. All authors  
397 discussed the results and contributed to the final manuscript.

398

## 399 **Declaration of interests**

400 The authors declare no conflict of interest.

401

402 The Milieu Intérieur Consortium¶ is composed of the following team leaders: Laurent Abel  
403 (Hôpital Necker), Andres Alcover, Hugues Aschard, Philippe Bouso, Nollaig Bourke (Trinity  
404 College Dublin), Petter Brodin (Karolinska Institutet), Pierre Bruhns, Nadine Cerf-Bensussan  
405 (INSERM UMR 1163 – Institut Imagine), Ana Cumano, Christophe D’Enfert, Ludovic Deriano,  
406 Marie-Agnès Dillies, James Di Santo, Gérard Eberl, Jost Enninga, Jacques Fellay (EPFL,  
407 Lausanne), Ivo Gomperts-Boneca, Milena Hasan, Gunilla Karlsson Hedestam (Karolinska  
408 Institutet), Serge Hercberg (Université Paris 13), Molly A Ingersoll (Institut Cochin and Institut  
409 Pasteur), Olivier Lantz (Institut Curie), Rose Anne Kenny (Trinity College Dublin), Mickaël  
410 Ménager (INSERM UMR 1163 – Institut Imagine), Frédérique Michel, Hugo Mouquet, Cliona  
411 O’Farrelly (Trinity College Dublin), Etienne Patin, Antonio Rausell (INSERM UMR 1163 –  
412 Institut Imagine), Frédéric Rieux-Laucat (INSERM UMR 1163 – Institut Imagine), Lars Rogge,  
413 Magnus Fontes (Institut Roche), Anavaj Sakuntabhai, Olivier Schwartz, Benno Schwikowski,  
414 Spencer Shorte, Frédéric Tangy, Antoine Toubert (Hôpital Saint-Louis), Mathilde Touvier  
415 (Université Paris 13), Marie-Noëlle Ungeheuer, Christophe Zimmer, Matthew L. Albert (Octant  
416 Biosciences), Darragh Duffy§, Lluís Quintana-Murci§,

417 ¶ unless otherwise indicated, partners are located at Institut Pasteur, Paris

418 § co-coordinators of the Milieu Intérieur Consortium

419 Additional information can be found at:

420 <https://www.milieuinterieur.fr/en/>

421

422 **Figure legends**

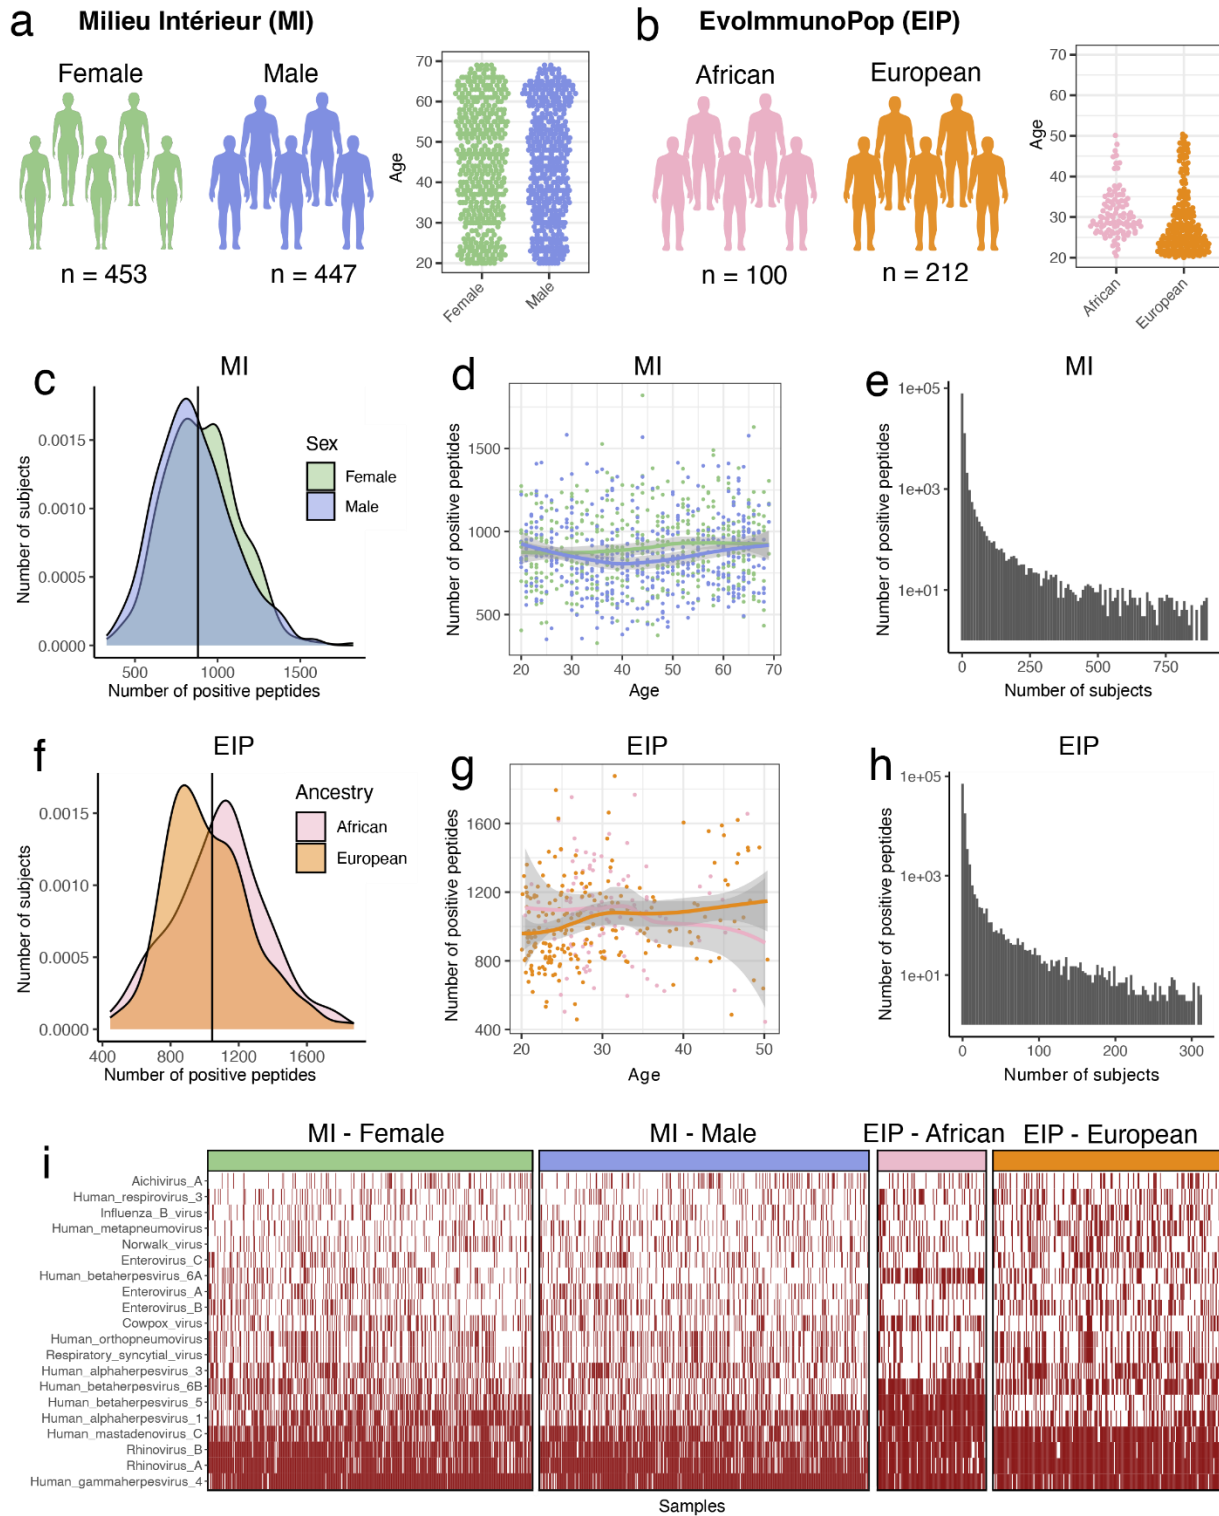

423  
 424 **Fig. 1: Assessing variation in the antibody repertoire in the Milieu Intérieur (MI) and**  
 425 **EvoImmunoPop (EIP) cohorts. a, Sample sizes and age distribution by sex within the MI**

426 cohort. **b**, Sample sizes and age distribution by continent of birth within the EIP cohort. **c**,  
427 Density distributions of MI donors as a function of the number of peptides they react against,  
428 categorized by sex. **d**, Number of positive peptides per MI donor, as a function of age and sex. **e**,  
429 Number of peptides as a function of the number of positive MI donors. **f**, Density distributions of  
430 EIP donors as a function of the number of peptides they react against, categorized by continent  
431 of birth. **g**, Number of positive peptides per EIP donor, as a function of age and continent of  
432 birth. **h**, Number of peptides as a function of the number of positive EIP donors. **i**, Heatmap  
433 indicating the predicted infection status of each MI and EIP donor for the 20 most prevalent  
434 viruses, as determined by the AVARDA algorithm ( $P_{\text{adj}} < 0.05$  after Benjamini-Hochberg  
435 correction). The solid curves and shaded areas in **d** and **g** indicate the LOESS curves and the  
436 95% confidence intervals.  
437



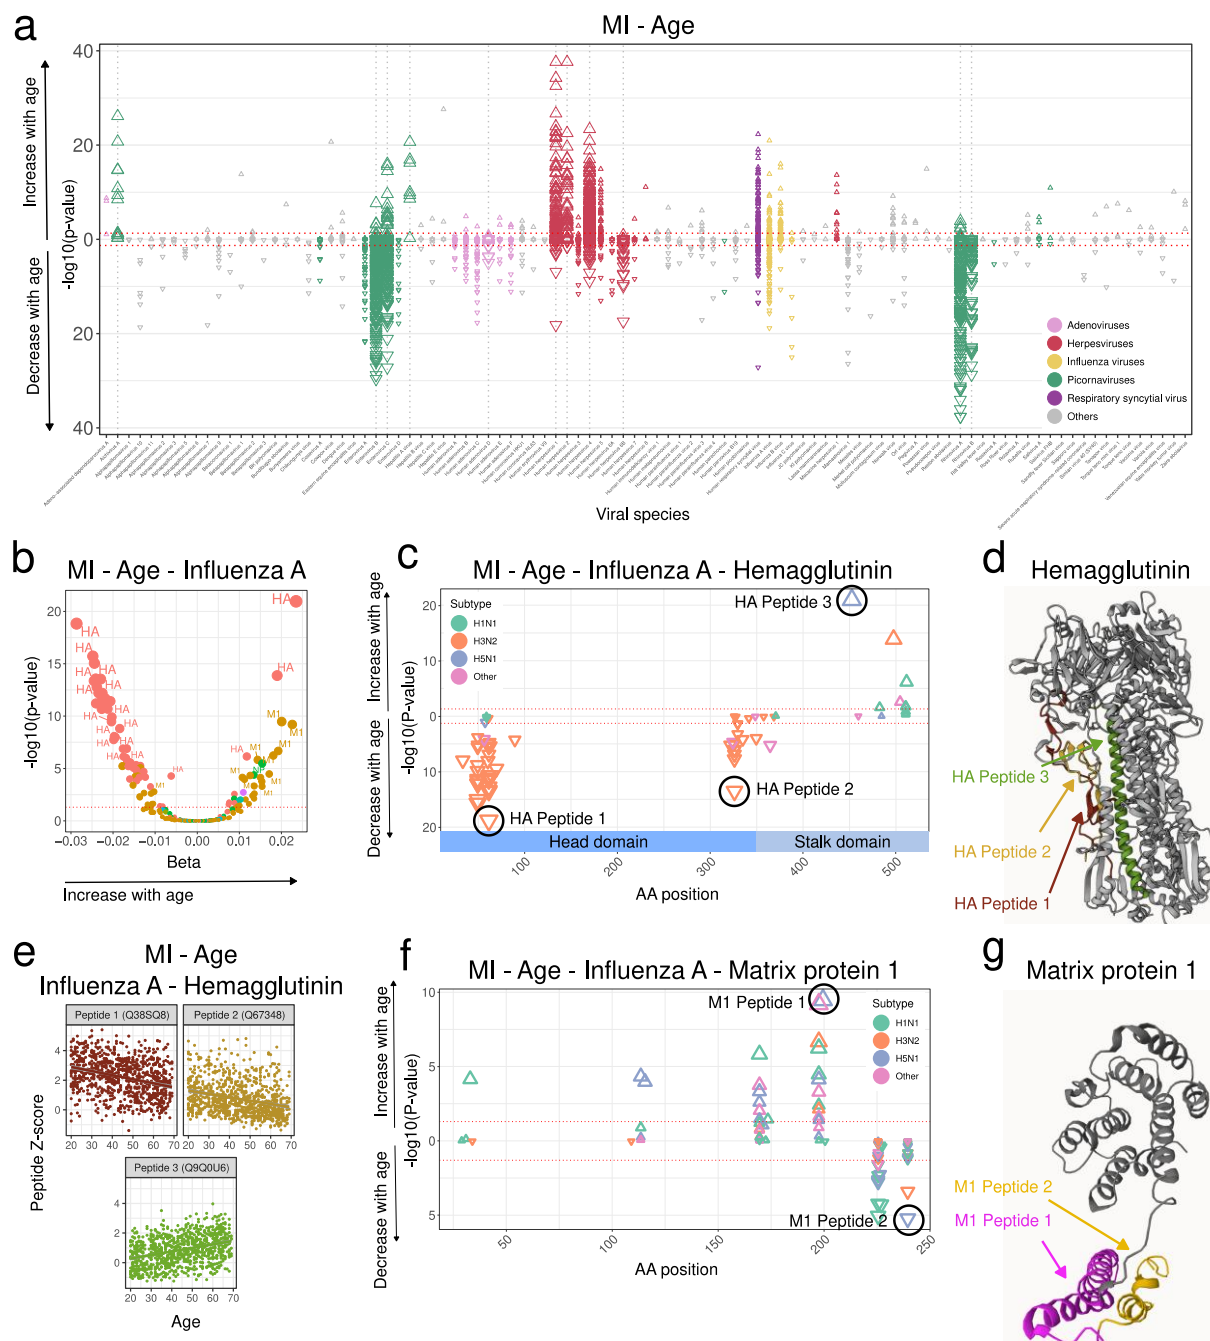

438  
 439 **Fig. 2: Age impacts the epitope-specific antiviral antibody repertoire.** **a**,  $-\log_{10}$ (adjusted  $P$ -  
 440 values) and direction of associations between all public peptide  $Z$ -scores and age in the MI  
 441 cohort, by viral species. The dashed gray vertical lines indicate viruses for which the AVARDA  
 442 breadth score is significantly associated with age. **b**,  $-\log_{10}$ (adjusted  $P$ -values) against effect  
 443 sizes of associations between IAV peptide  $Z$ -scores and age in the MI cohort, colored by viral  
 444 protein. **c**, Amino-acid positions of the midpoint of public HA peptides associated with age

445 within the full IAV hemagglutinin (HA) protein for the MI cohort. The significance and direction  
446 of associations with age are indicated on the y-axis and by the direction of triangles, respectively.  
447 The triangle color indicates the IAV subtype. The most significant peptides for each epitope are  
448 indicated. **d**, Location of the peptides of interest indicated in **(c)** within the three-dimensional  
449 structure of HA. **e**, Antibody reactivity as a function of age for the HA peptides of interest  
450 highlighted in **(c)**. **f**, Amino-acid positions of the midpoint of public M1 peptides associated with  
451 age within the full IAV Matrix Protein 1 (M1) protein for the MI cohort. The significance and  
452 direction of associations with age are indicated on the y-axis and by the direction of triangles,  
453 respectively. The triangle color indicates the IAV subtype. The most significant peptides for each  
454 epitope are indicated. **g**, Location of the peptides of interest indicated in **(f)** within the three-  
455 dimensional structure of M1.  
456

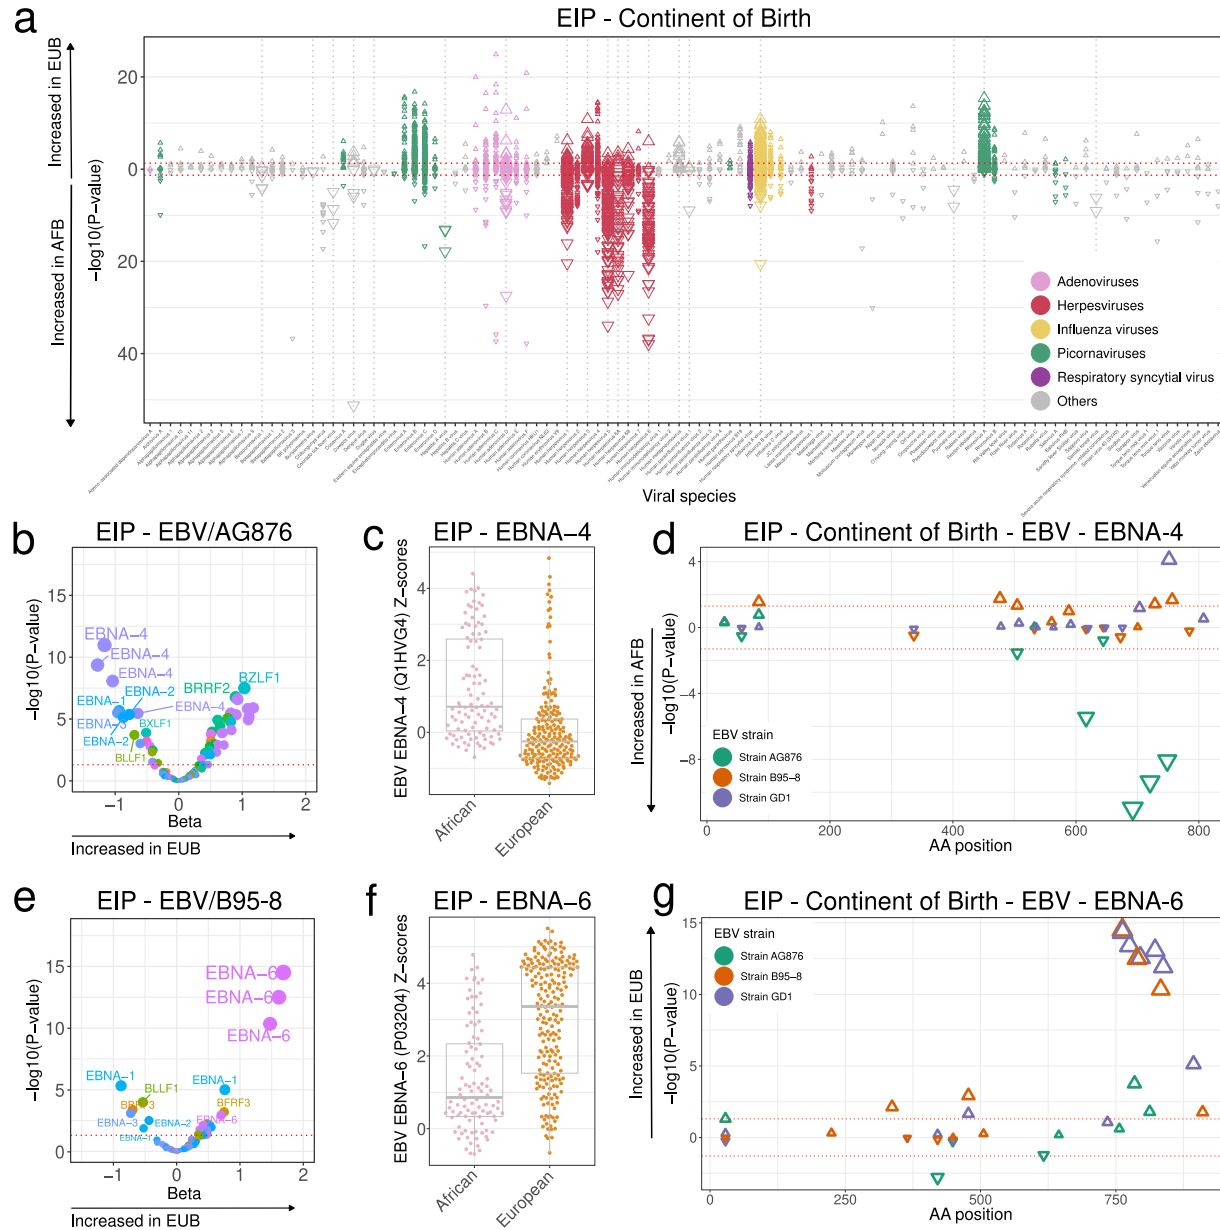

457

458 **Fig. 3: The antiviral antibody repertoire in relation to the continent of birth. a, –**  
 459  $\log_{10}(\text{adjusted } P\text{-values})$  and direction of associations between all public peptide Z-scores and  
 460 continent of birth in the EIP cohort, separated by viral species. AFB and EUB indicate Belgian  
 461 individuals born in Central Africa and Europe, respectively. The dashed gray vertical lines  
 462 indicate viruses for which the AVARDA breadth score is significantly associated with continent  
 463 of birth. **b, –**  $-\log_{10}(\text{adjusted } P\text{-values})$  against effect sizes of associations between continent of  
 464 birth and peptide Z-scores from the EBV AG876 strain in the EIP cohort. Colors indicate the  
 465 viral protein. **c, –** Scatter plot of antibody reactivity against the most significant EBNA-4 peptide

466 (Uniprot ID: Q1HVG4) from the EBV AG876 strain, categorized by continent of birth, **d**,  
467 Amino-acid positions of the midpoint of public EBNA-4 peptides associated with continent of  
468 birth within the full EBV EBNA-4 protein for the MI cohort. The significance and direction of  
469 associations with age are indicated on the y-axis and by the direction of triangles, respectively.  
470 The triangle colors indicate EBV strain. **e**,  $-\log_{10}(\text{adjusted } P\text{-values})$  against effect sizes of  
471 associations between continent of birth and peptide Z-scores from the EBV B95–8 strain in the  
472 EIP cohort. Colors indicate the viral protein. **f**, Scatter plot of antibody reactivity against the  
473 most significant EBNA-6 peptide (Uniprot ID: P03204) from EBV B95–8, categorized by  
474 continent of birth, **g**, Amino-acid positions of EBV peptides in the EBNA-6 protein associated  
475 with continent of birth in the EIP cohort. Amino-acid positions of the midpoint of all public  
476 EBNA-6 peptides associated with continent of birth within the full EBV EBNA-6 protein for the  
477 MI cohort. The significance and direction of associations with age are indicated on the y-axis and  
478 by the direction of triangles, respectively. The triangle color indicates the EBV strain.  
479  
480

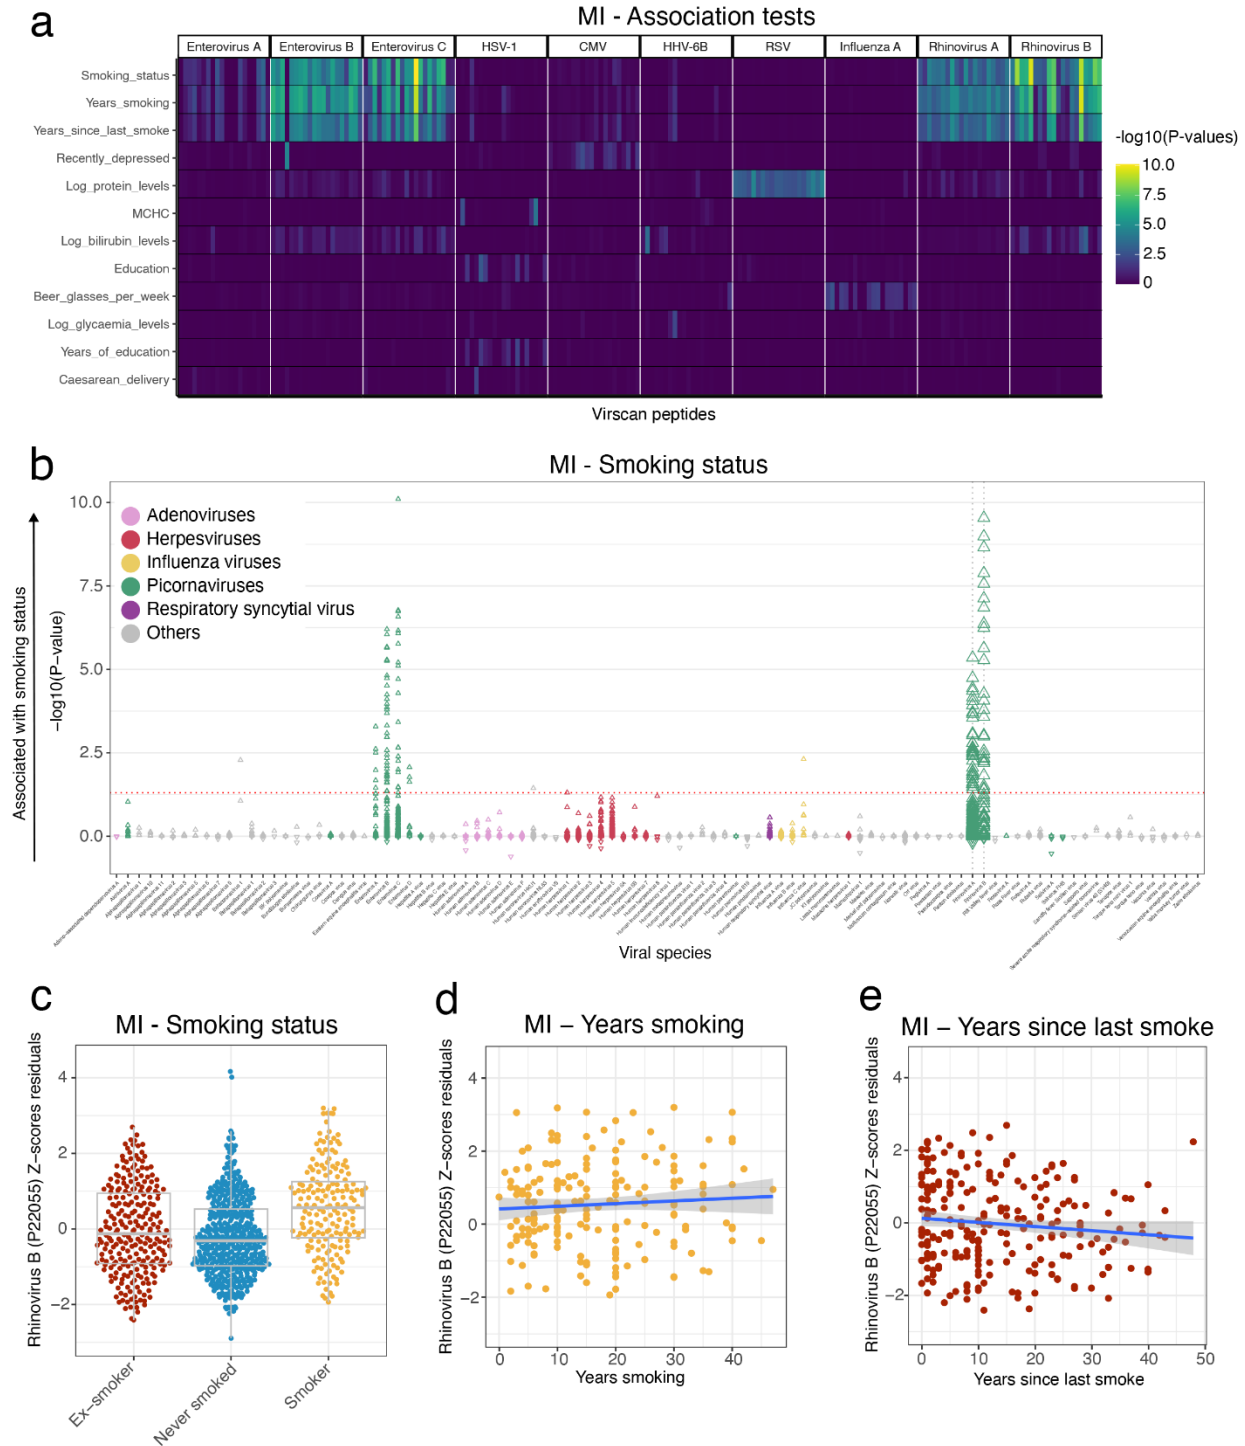

481  
 482 **Fig. 4: Tobacco smoking elicits strong, reversible effects on antiviral antibody responses.**  
 483 **a**,  $-\log_{10}(\text{adjusted } P\text{-values})$  for associations between public peptide Z-scores and health- and  
 484 lifestyle-related variables. Only the 20 most significant peptides from the ten viruses with the  
 485 most significant associations are shown. Only variables with an association of  $P_{\text{adj}} < 0.01$  are

486 shown. **b**,  $-\log_{10}(\text{adjusted } P\text{-values})$  and direction of associations between all public peptide Z-  
487 scores and smoking status in the MI cohort, separated by viral species. The direction indicates  
488 positive or negative association with smoking compared to non-smokers. The dashed gray  
489 vertical lines indicate viruses for which the AVARDA breadth score is significantly associated  
490 with smoking status. **c**, Antibody reactivity for the rhinovirus B peptide most significantly  
491 associated with smoking status, categorized by smoking status. **d**, Antibody reactivity for the  
492 rhinovirus B peptide most significantly associated with smoking status, as a function of years of  
493 smoking in active smokers. **e**, Antibody reactivity for the rhinovirus B peptide most significantly  
494 associated with smoking status, as a function of years since last smoking in former smokers. **d**, **e**,  
495 The blue line indicates the linear regression line, and the shaded area the 95% confidence  
496 intervals.  
497

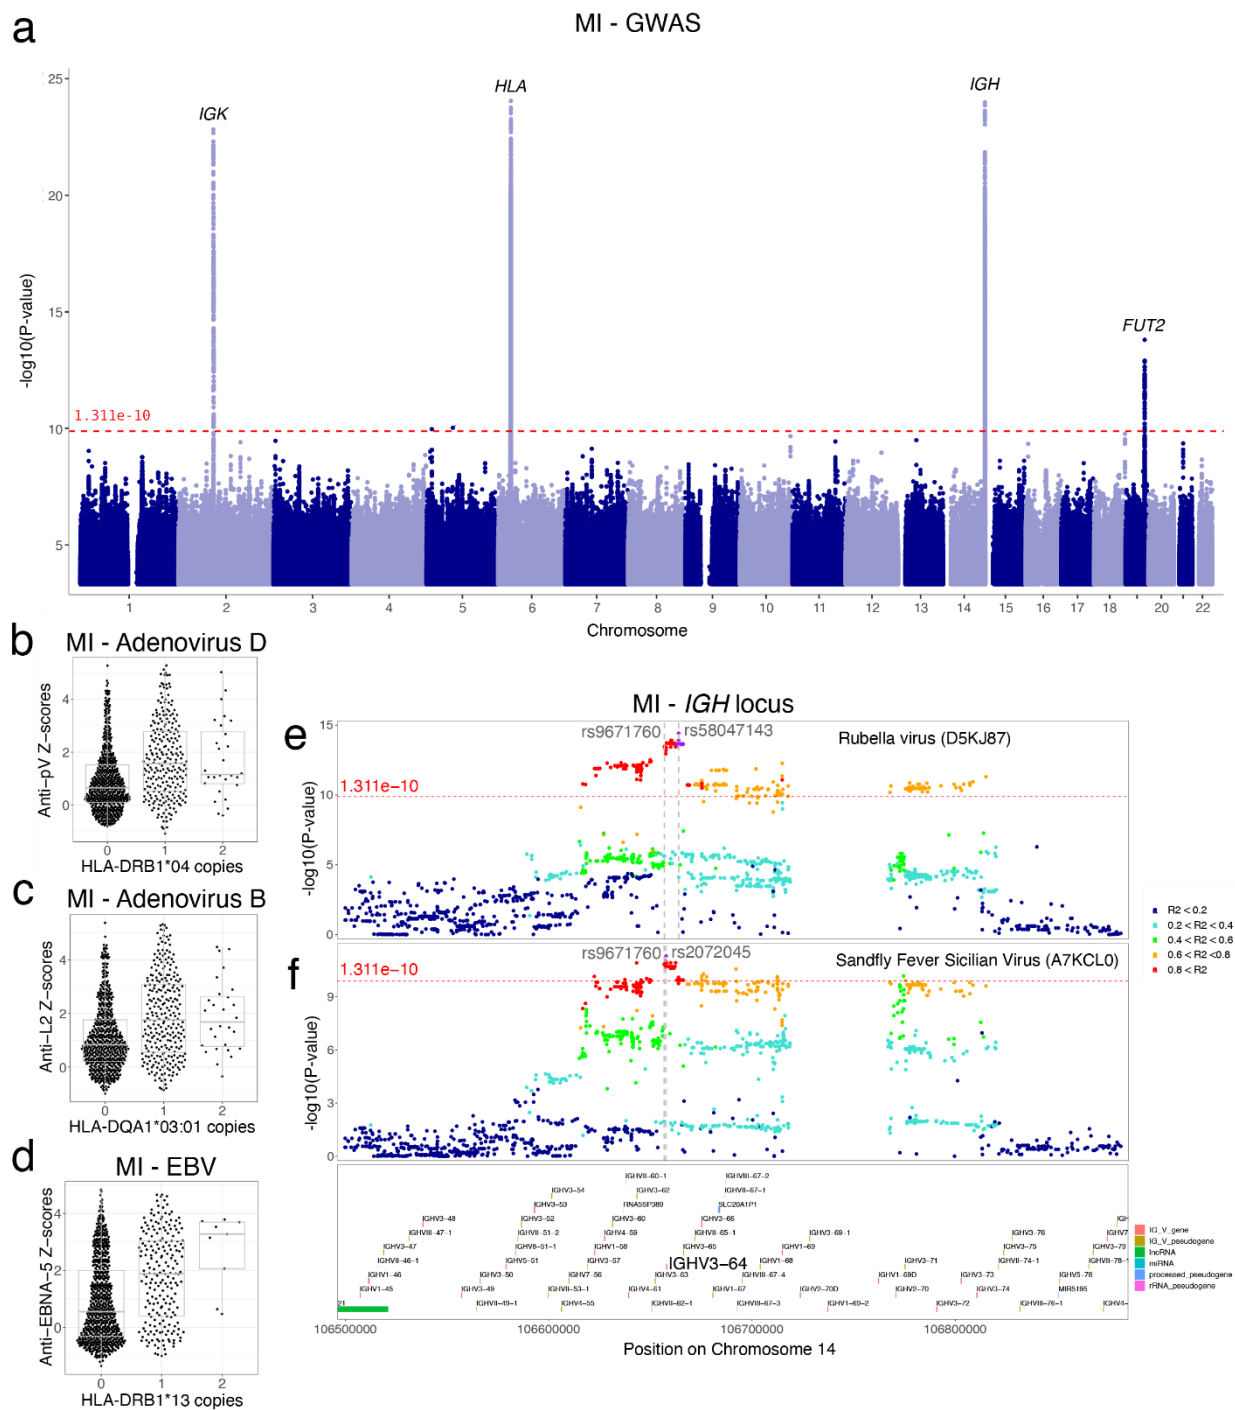

498  
 499 **Fig. 5: Genome-wide association study of antibody reactivity against public peptides. a,**  
 500 **Manhattan plot of associations between all 2,608 public peptides and common human genetic**  
 501 **variants (MAF > 5%) in the MI cohort. Only results with  $P < 0.005$  are displayed. The red**  
 502 **dashed line indicates the significance threshold ( $P < 1.31 \times 10^{-10}$ ), determined by permutations.**  
 503 **The top hit of each peak is annotated with the closest gene or gene locus. b, Antibody reactivity**

504 against the pV protein of adenovirus D, as a function of the number of copies of the *HLA-*  
505 *DRBI\*04* allele. **c**, Antibody reactivity against the L2 protein of adenovirus B, as a function of  
506 the number of copies of the *HLA-DQAI\*03:01* allele. **d**, Antibody reactivity against the EBNA-5  
507 protein of EBV, as a function of the number of copies of the *HLA-DRBI\*13* allele. **e,f**,  
508 LocusZoom plots for the associations between *IGH* variants and antibody reactivity against (**e**)  
509 the rubella virus (UniProt ID: D5KJ87) and (**f**) the sandfly fever Sicilian virus (UniProt ID:  
510 A7KCL0). The variant most significantly associated with antibody reactivity and the closest  
511 guQTL variant (rs9671760) are indicated by gray vertical lines. *IGHV* segment locations are  
512 indicated at the bottom, and the V-segment targeted by the guQTL variant (*IGHV3-64*) is  
513 highlighted.  
514  
515



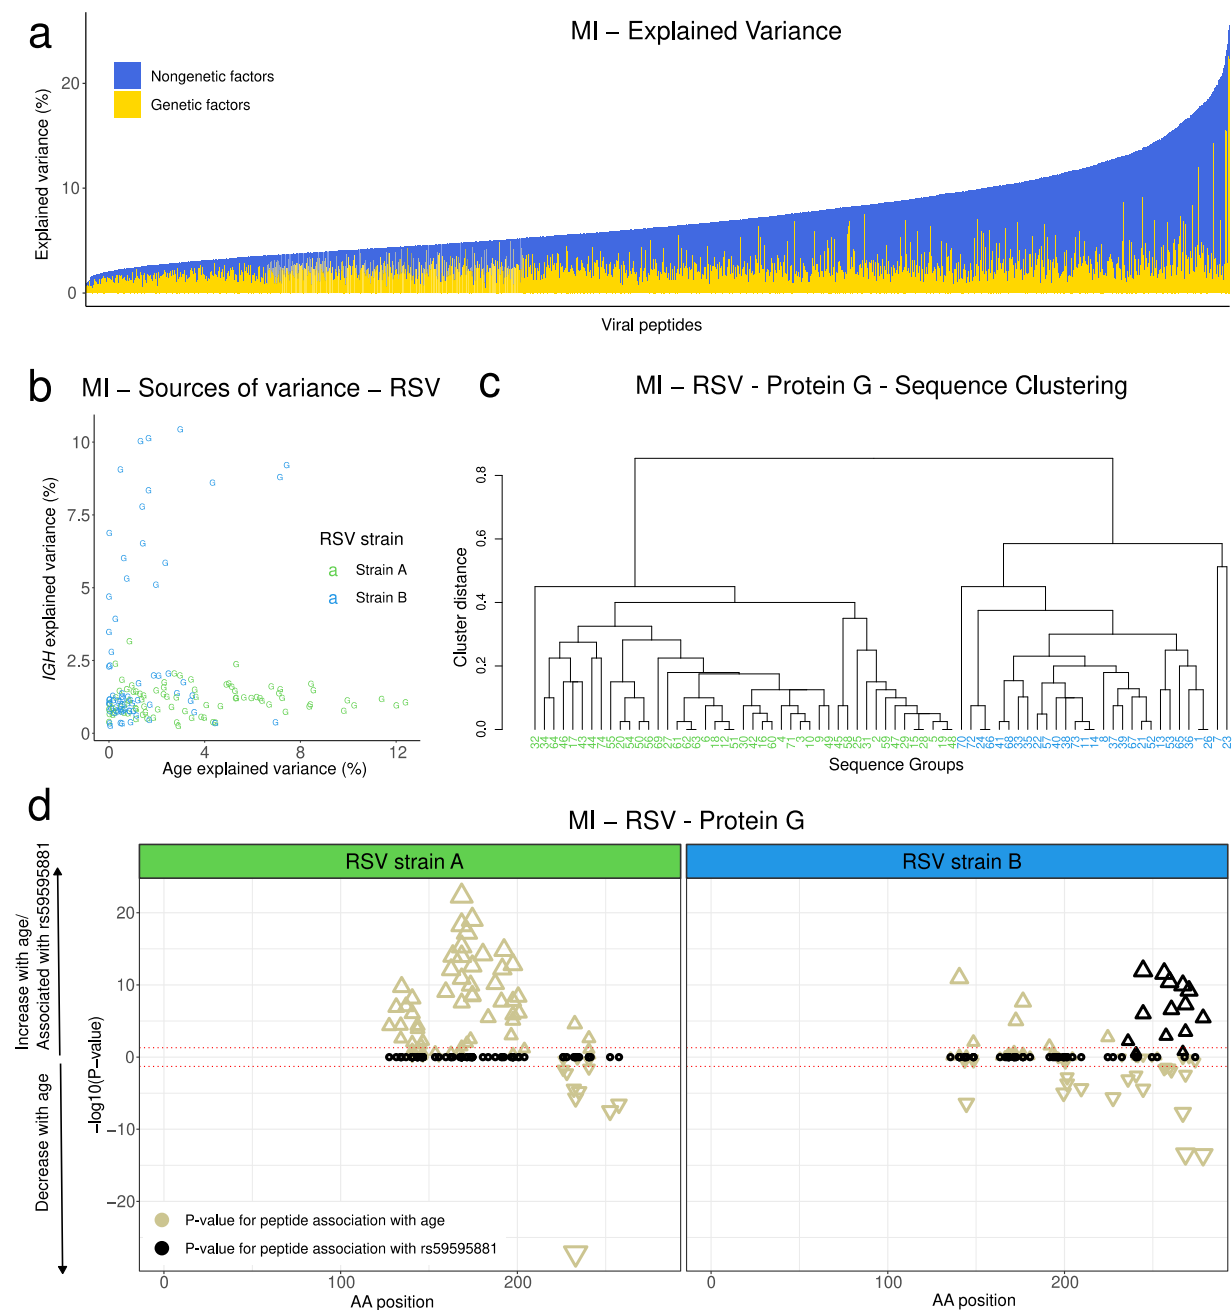

516  
 517 **Fig. 6: Variance in antiviral antibody reactivity explained by demographic and genetic**  
 518 **factors.** **a**, Proportion of variance explained by demographic (i.e., age, sex, and smoking) and  
 519 genetic factors for antibody reactivity against 2,608 public peptides in the MI cohort. Peptides  
 520 are sorted by total variance explained. **b**, Variance explained by age and *IGH* genetic variation  
 521 for RSV protein G peptides in the MI cohort, colored according to RSV strain as in (c). **c**,  
 522 Hierarchical clustering of peptide sequences from RSV protein G, separating peptides affiliated  
 523 to the RSV A (green) and B (blue) strains. **d**, Amino-acid positions of the midpoint of protein G

524 peptides associated with continent of birth within the full RSV protein G for the MI cohort. *P*-  
525 values for the association with age (beige) and the most significant *IGH* variant (black) are  
526 indicated, separated by RSV strain. The significance and direction of associations are indicated  
527 on the y-axis and by the direction of triangles, respectively.  
528  
529

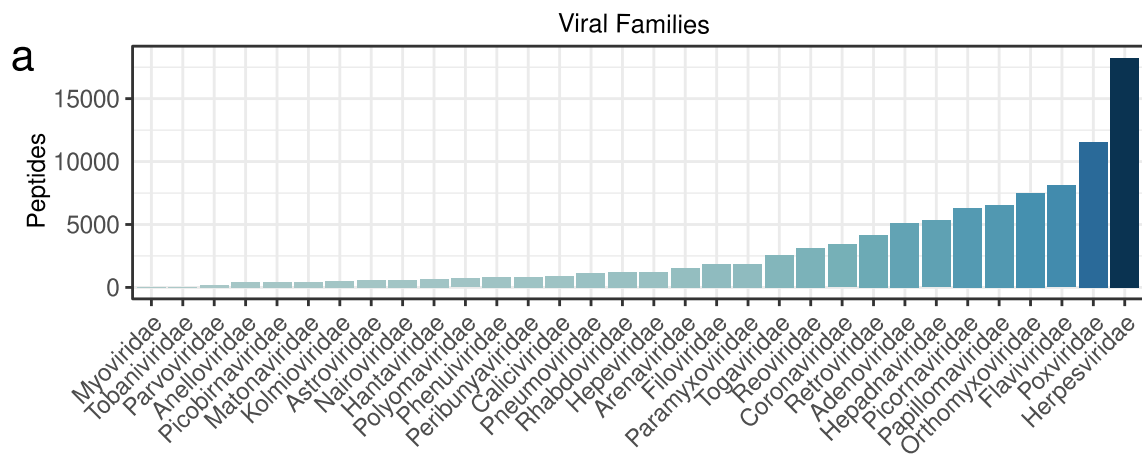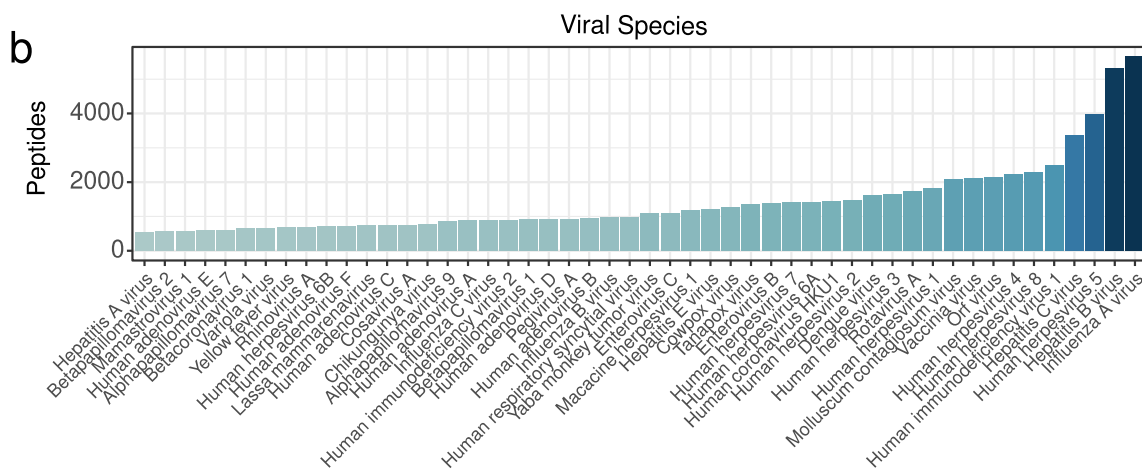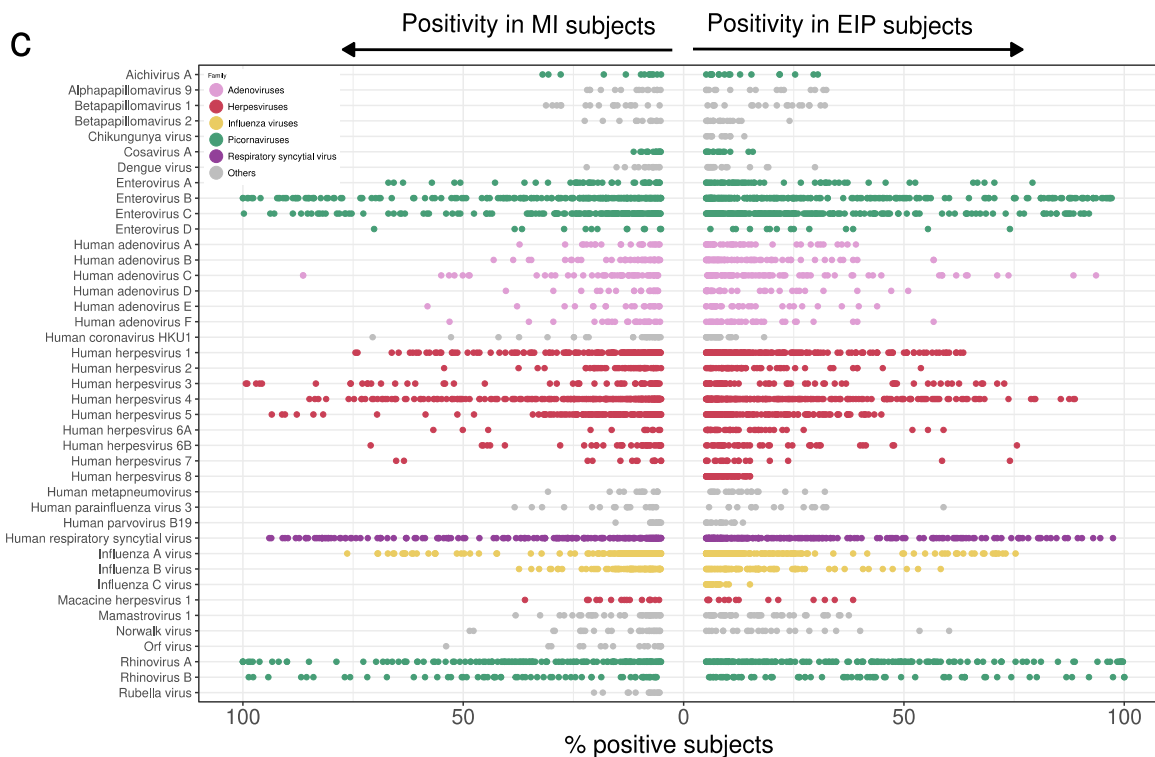

531 **Extended Data Fig. 1: Overview of the viruses targeted by the VirScan assay in the Milieu**  
532 **Intérieur (MI) and EvoImmunoPop (EIP) cohorts. a,b**, Number of peptides in the VirScan  
533 PhIP-seq library, separated by viral family (**a**) and viruses (**b**). Only the 50 most covered viruses  
534 are shown. **c**, Percentage of MI (left) and EIP (right) individuals positive for 2,608 public  
535 peptides, separated by virus. Each point indicates a viral peptide, colored according to its viral  
536 family. Only viruses with at least 10 peptides showing an enrichment of >5% are included.  
537  
538

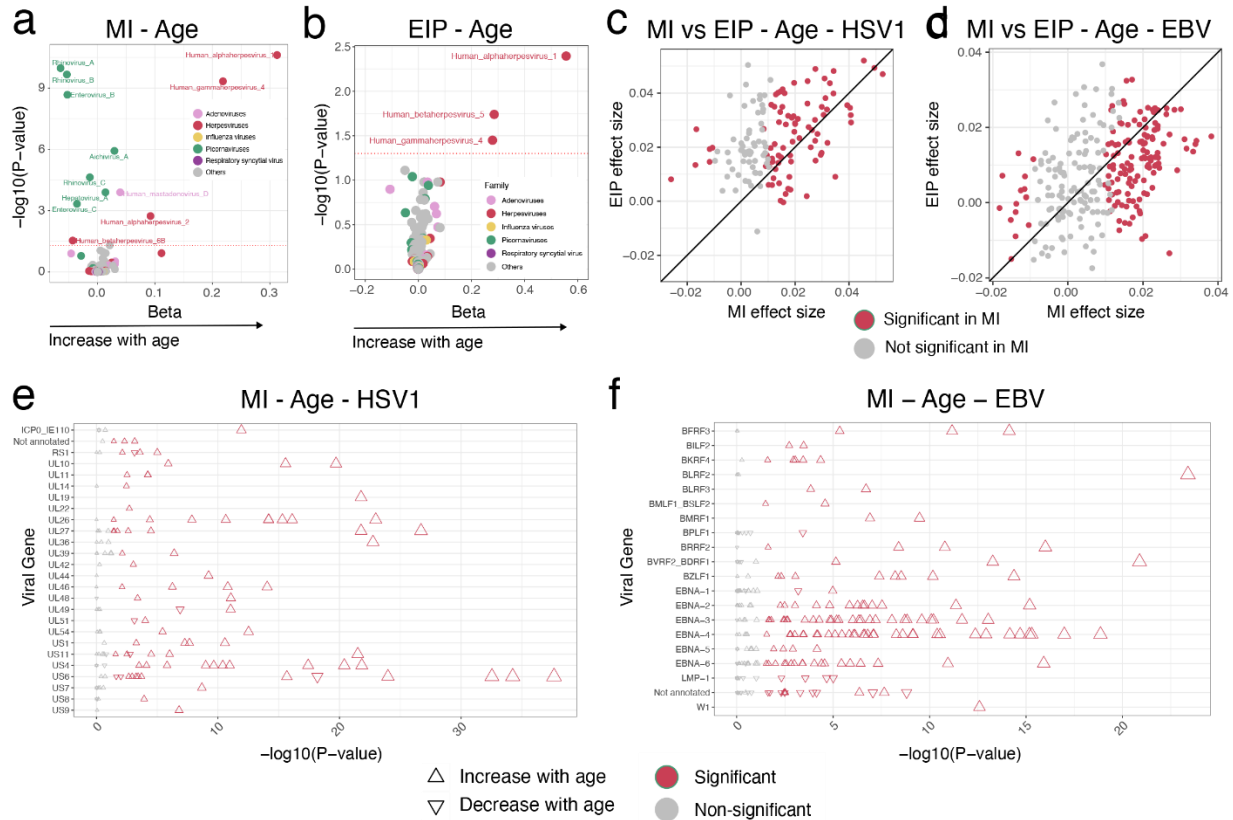

539  
 540 **Extended Data Fig. 2: Additional age differences in the antiviral antibody repertoire. a,b,**  
 541  $\log_{10}(\text{adjusted } P\text{-values})$  against effect sizes for associations between the AVARDA breadth  
 542 score and age in the MI (a) and EIP (b) cohorts. Each point indicates a virus, colored according  
 543 its viral family. c,d, Effect sizes for the associations between age and HSV-1 (c) and EBV (d)  
 544 peptide Z-scores in the MI and EIP cohorts. e,f,  $-\log_{10}(\text{adjusted } P\text{-values})$  of associations  
 545 between age and HSV-1 (e) and EBV (f) peptide Z-scores, separated by viral protein, in the MI  
 546 cohort. The significance and direction of associations are indicated by color and by the direction  
 547 of triangles, respectively.

548

549

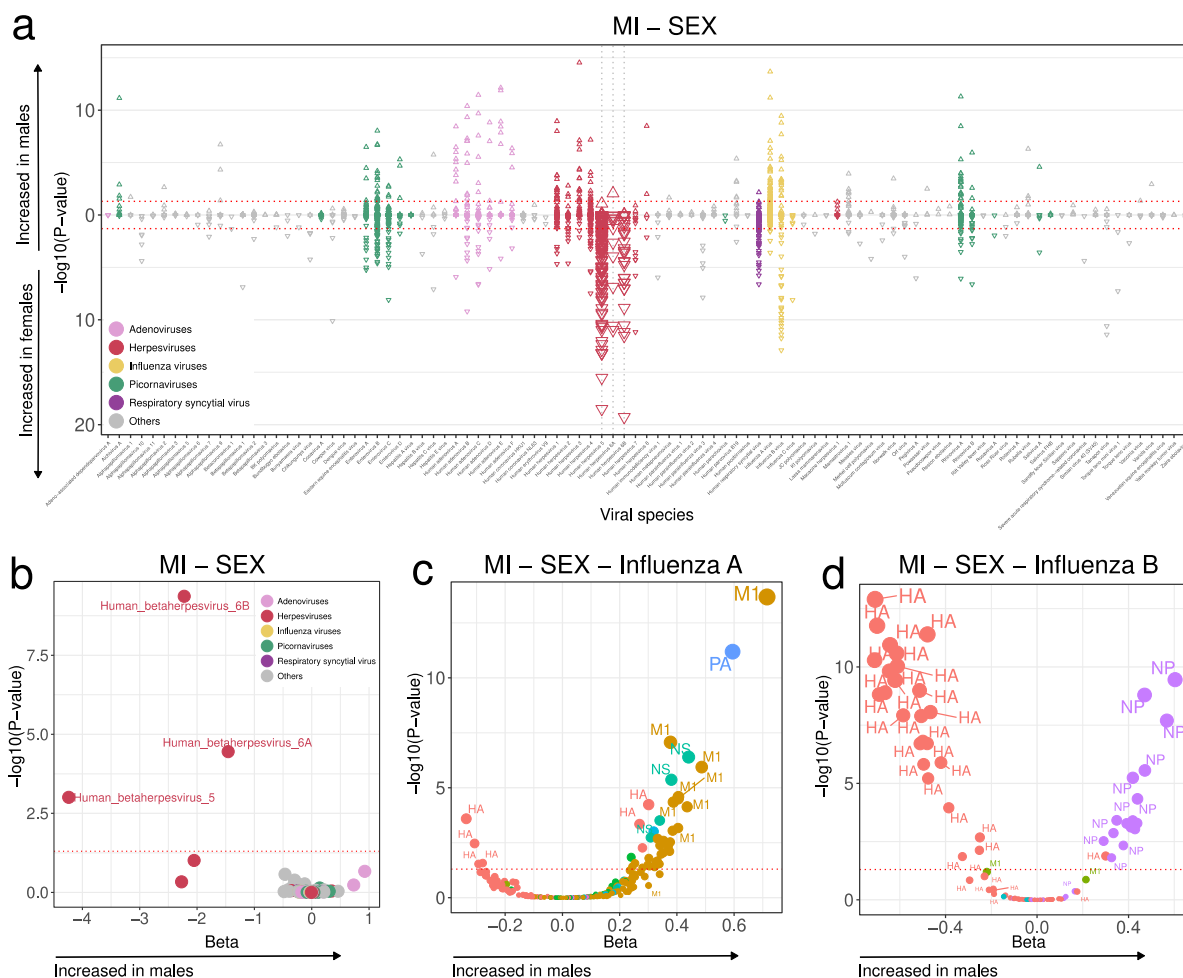

550  
 551 **Extended Data Fig. 3. Sex differences in the antiviral antibody repertoire. a**,  $-\log_{10}$ (adjusted  
 552  $P$ -values) and direction of associations between all public peptide Z-scores and sex in the MI  
 553 cohort. **b**,  $-\log_{10}$ (adjusted  $P$ -values) against effect sizes for associations between the AVARDA  
 554 breadth score and sex in the MI cohort. Each point indicates a virus, colored according to its viral  
 555 family. **c,d**,  $-\log_{10}$ (adjusted  $P$ -values) against effect sizes for associations between IAV (**c**) and  
 556 IBV (**d**) peptide Z-scores and sex in the MI cohort, colored according to the viral protein.

557  
 558

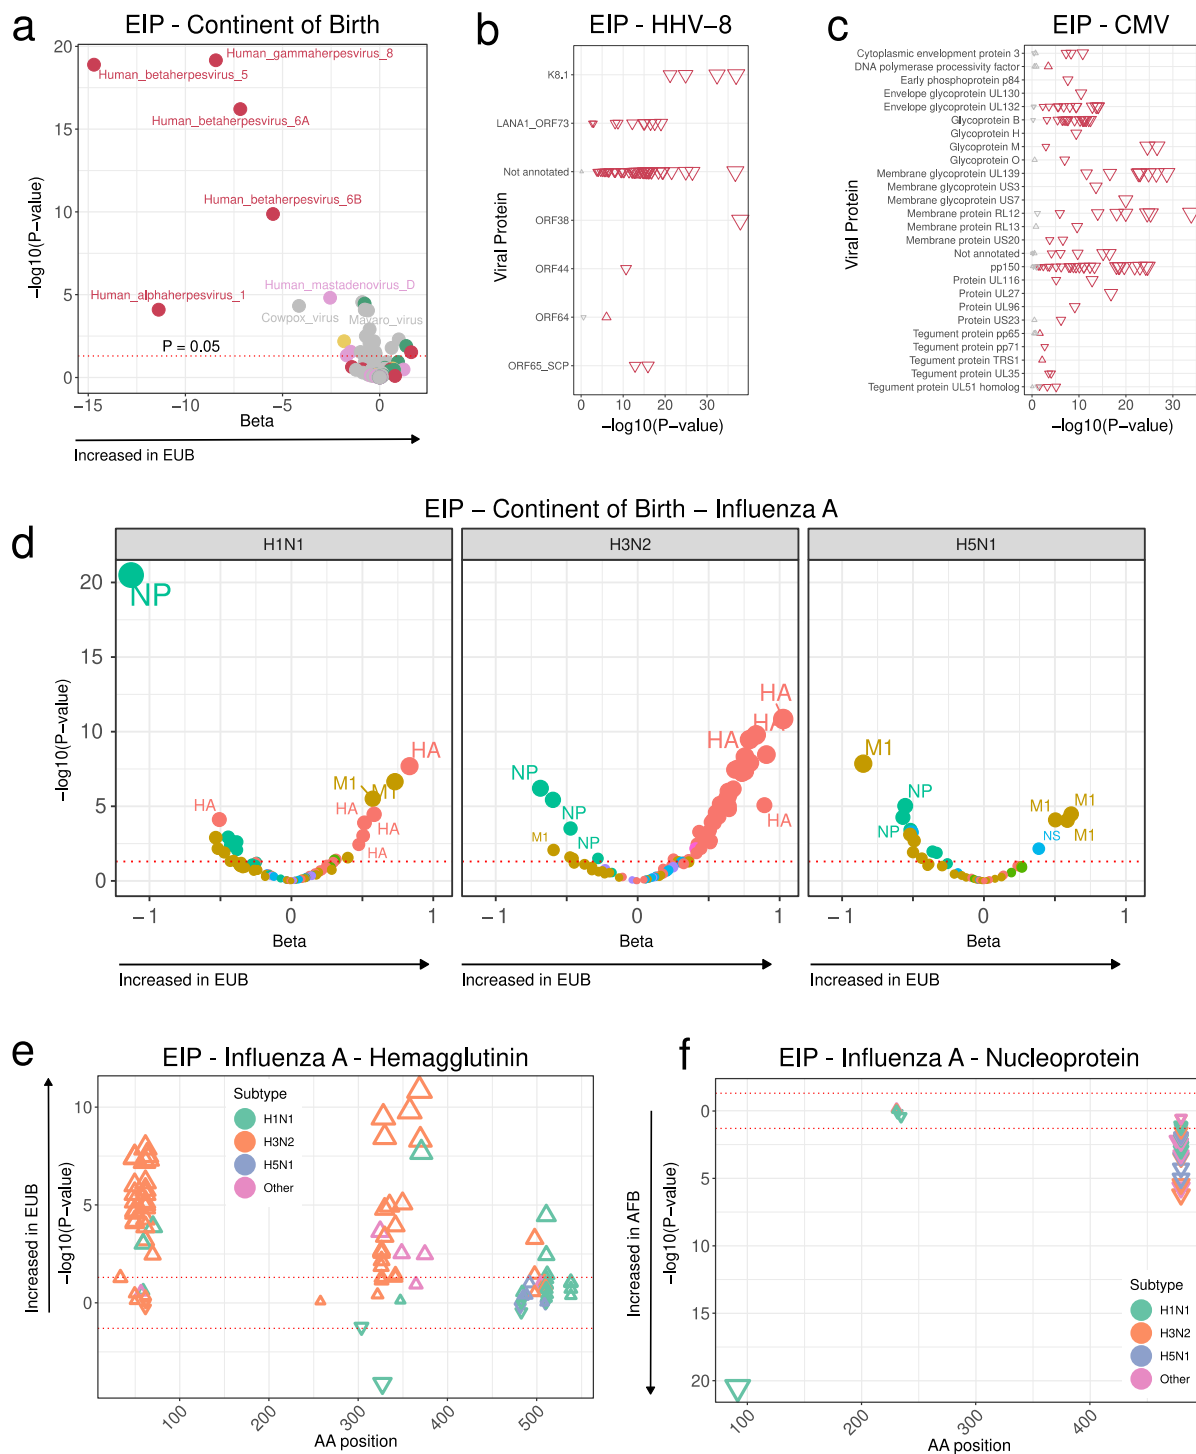

559  
 560 **Extended Data Fig. 4. Additional population differences in the antiviral antibody**  
 561 **repertoire. a,**  $-\log_{10}(\text{adjusted } P\text{-values})$  against effect sizes for associations between the  
 562 AVARDA breadth score and continent of birth in the EIP cohort. Each point indicates a virus,  
 563 colored according to its viral family. **b,c,**  $-\log_{10}(\text{adjusted } P\text{-values})$  of associations between

564 continent of birth and HHV-8 (**b**) and CMV (**c**) peptide *Z*-scores, separated by viral protein, in  
565 the EIP cohort. The significance and direction of associations are indicated by color and by the  
566 direction of triangles, respectively. **d**,  $-\log_{10}(\text{adjusted } P\text{-values})$  against effect sizes for  
567 associations between IAV peptide *Z*-scores and continent of birth in the EIP cohort, faceted by  
568 main IAV subtypes. Colors indicate the viral protein. **e,f**, Amino-acid positions of the midpoint  
569 of HA (**e**) and NP (**f**) peptides associated with continent of birth within the full IAV proteins for  
570 the EIP cohort. The significance and direction of associations with age are indicated on the y-  
571 axis and by the direction of triangles, respectively. The triangle color indicates the IAV subtype.  
572  
573



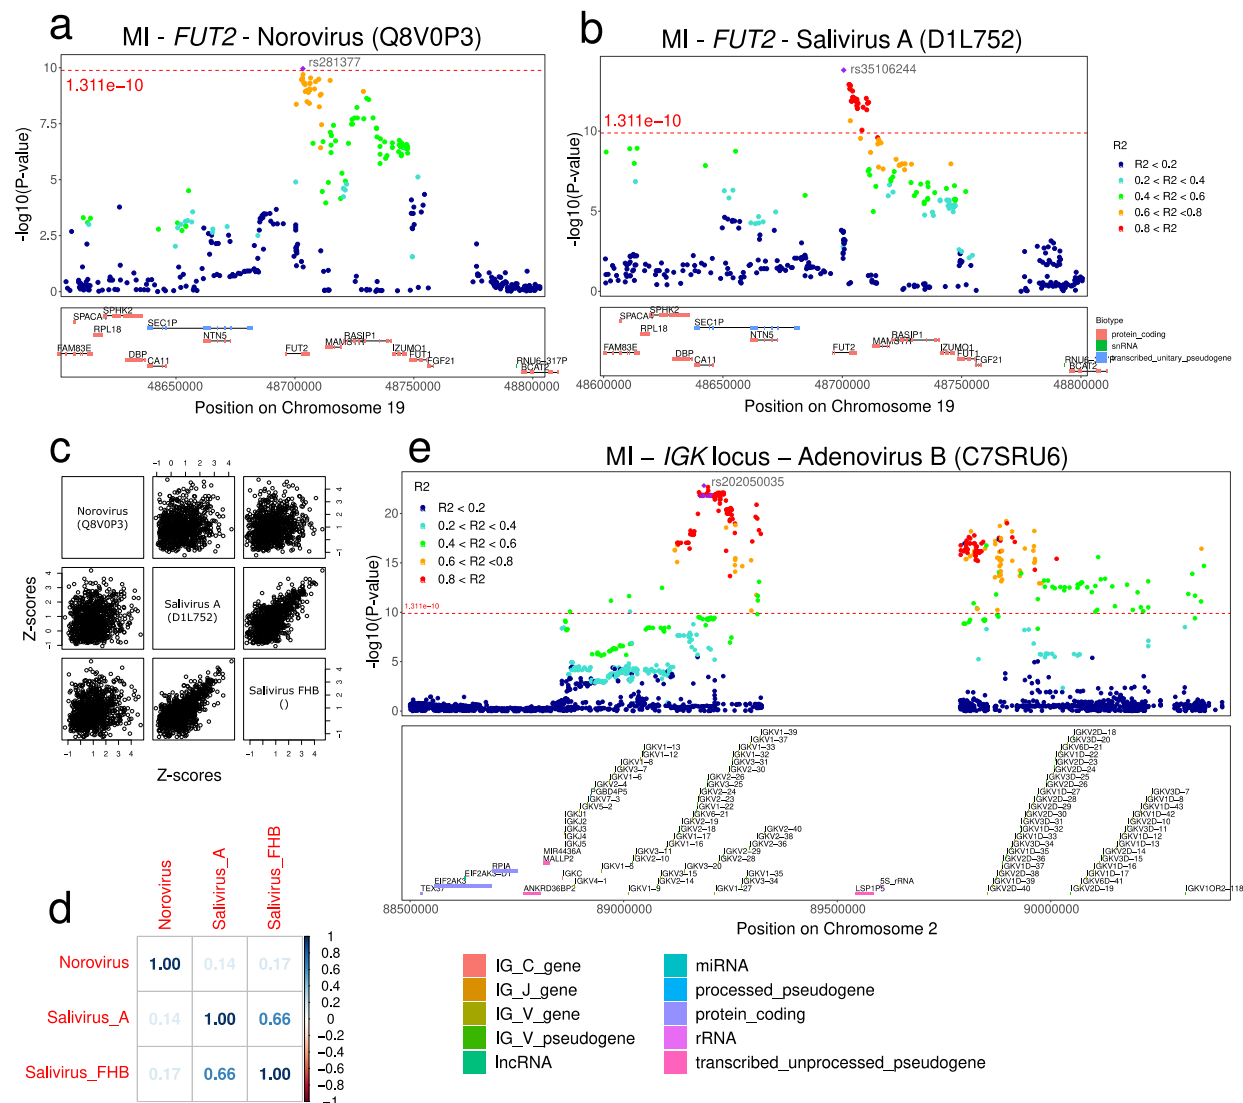

574  
 575 **Extended Data Fig. 5. Association of genetic variation in the *FUT2* and *IGH* loci with the**  
 576 **antiviral antibody repertoire. a,b,** LocusZoom plots showing associations between the *FUT2*  
 577 locus and antibody reactivity against (a) norovirus (UniProt ID: Q8V0P3) and (b) salivirus A  
 578 (UniProt ID: D1L752). c,d, Scatter plots (c) and correlation matrix (d) for the three norovirus  
 579 and salivirus peptide Z-scores most significantly associated with *FUT2* variants. e, LocusZoom  
 580 plot showing associations between the *IGH* locus and antibody reactivity against adenovirus B  
 581 (UniProt ID: C7SRU6).

582  
 583

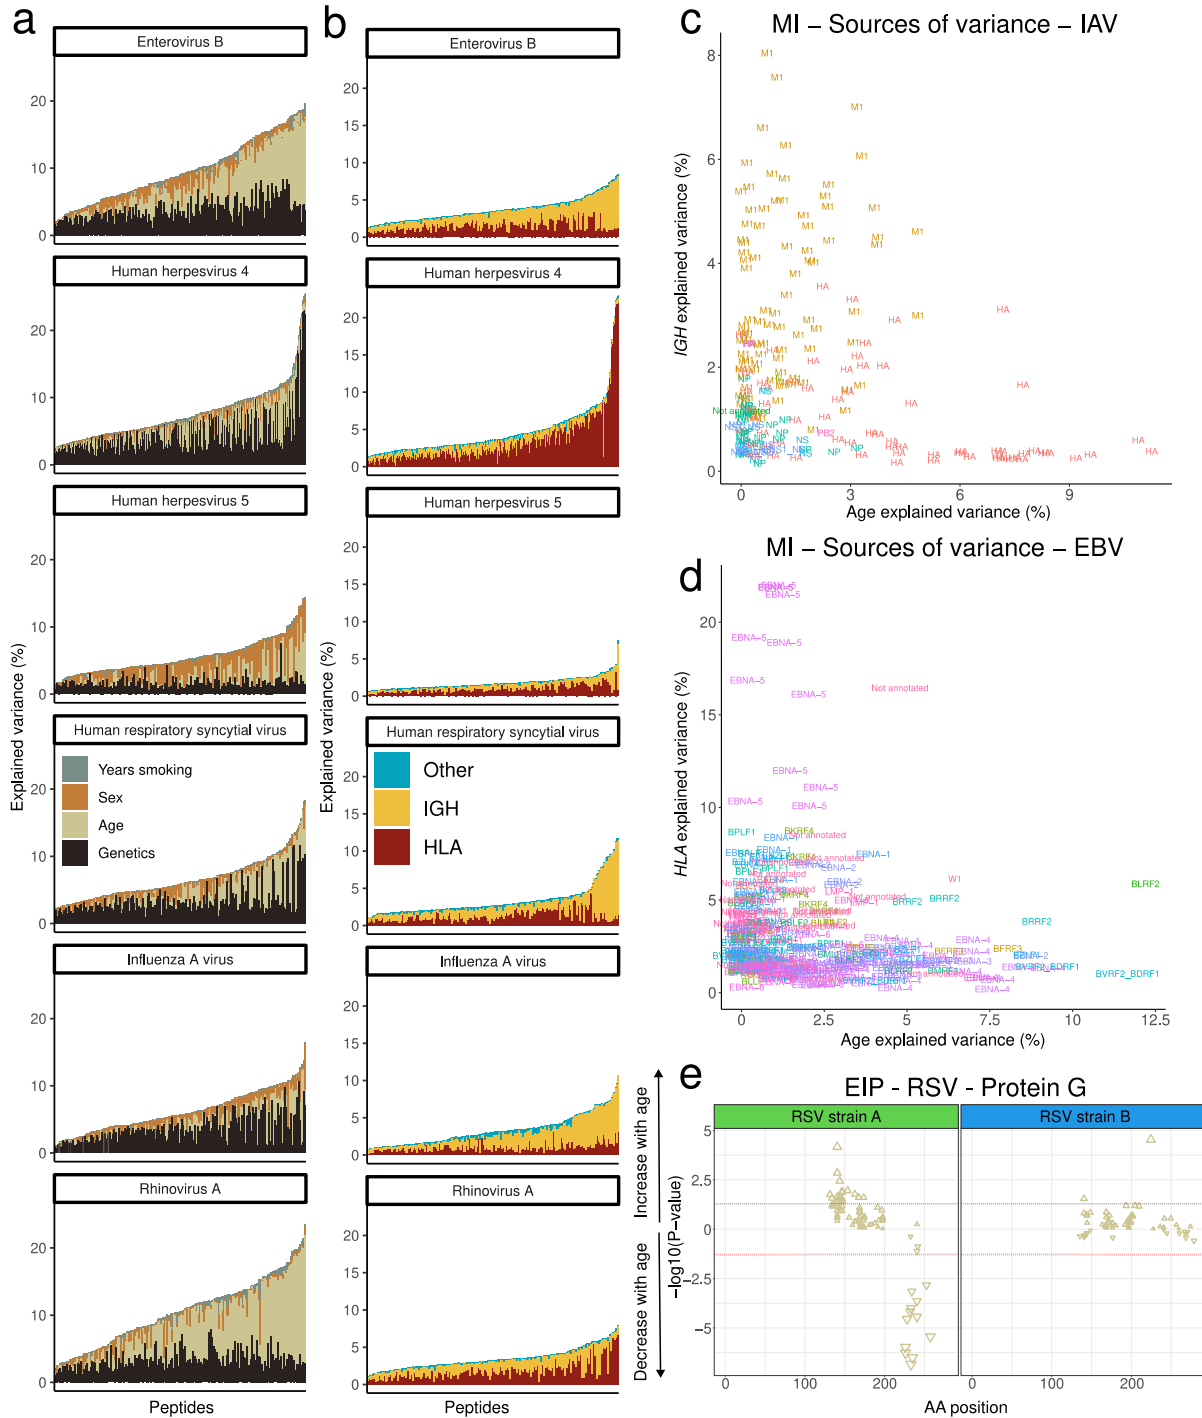

584  
 585 **Extended Data Fig. 6. Variance in the antiviral antibody repertoire explained by individual**  
 586 **factors. a**, Proportion of variance explained by age, sex, smoking, and genetics for antibody  
 587 reactivity against public peptides from the six viruses with the largest number of public peptides  
 588 in the MI cohort. Peptides are sorted by total variance explained. **b**, Proportion of variance  
 589 explained by genetic factors for antibody reactivity against public peptides from the six viruses

590 with the largest number of public peptides in the MI cohort. Genetic variance is separated by  
591 genetic variation in the *HLA* and *IGH* loci and variation external to these loci. Peptides are sorted  
592 by total variance explained. **c,d**, Variance explained by age and *IGH* genetic variation for IAV  
593 peptides (**c**) and age and *HLA* genetic variation for EBV peptides (**d**) in the MI cohort, colored  
594 according to protein. **e**, Amino-acid positions of the midpoint of protein G peptides associated  
595 with continent of birth within the full RSV protein G for the EIP cohort. The significance and  
596 direction of associations are indicated on the y-axis and by the direction of triangles,  
597 respectively.

## Tables

| Gene             | Chr. | Position | MAF    | Virus                       | Viral protein | <i>P</i> (MI) | <i>P</i> (EIP) |
|------------------|------|----------|--------|-----------------------------|---------------|---------------|----------------|
| <i>IGKV3-25</i>  | 2    | 89187836 | 0.0843 | Human adenovirus B          | L4            | 1.51E-23      | -              |
| <i>IGKV1D-35</i> | 2    | 89895578 | 0.0995 | Human adenovirus B          | L4            | 5.91E-20      | -              |
| <i>MICB</i>      | 6    | 31481439 | 0.398  | Human herpesvirus 4         | EBNA-5        | 6.26E-11      | 0.00201        |
| <i>NOTCH4</i>    | 6    | 32225442 | 0.229  | Enterovirus C               | Polyprotein   | 1.11E-10      | 0.182          |
| <i>TSBP1</i>     | 6    | 32382607 | 0.313  | Human adenovirus B          | L2            | 7.76E-21      | 2.37E-05       |
| <i>TSBP1</i>     | 6    | 32382607 | 0.313  | Human adenovirus C          | L2            | 1.34E-17      | 2.79E-05       |
| <i>TSBP1</i>     | 6    | 32382607 | 0.313  | Human adenovirus D          | Polyprotein   | 1.94E-19      | 0.00288        |
| <i>TSBP1</i>     | 6    | 32382607 | 0.313  | Human adenovirus E          | L2_HAdVE_gp09 | 1.24E-19      | 0.000444       |
| <i>TSBP1</i>     | 6    | 32382607 | 0.313  | Human adenovirus F          | L2            | 3.29E-16      | 0.00527        |
| <i>HLA-DRA</i>   | 6    | 32448589 | 0.208  | Norwalk virus               | ORF1          | 4.75E-12      | 0.0636         |
| <i>HLA-DRA</i>   | 6    | 32448589 | 0.208  | Rift Valley fever virus     | GP            | 1.60E-12      | 0.039          |
| <i>HLA-DRA</i>   | 6    | 32477883 | 0.229  | Human herpesvirus 4         | EBNA-5        | 4.58E-21      | 2.16E-08       |
| <i>HLA-DRB1</i>  | 6    | 32598244 | 0.362  | Enterovirus A               | Polyprotein   | 6.31E-14      | 0.0293         |
| <i>HLA-DRB1</i>  | 6    | 32601585 | 0.159  | Human adenovirus A          | L2            | 2.13E-17      | 0.00555        |
| <i>HLA-DRB1</i>  | 6    | 32606531 | 0.381  | Human parainfluenza virus 4 | N_NP          | 6.66E-11      | 0.00325        |
| <i>HLA-DQA1</i>  | 6    | 32626296 | 0.334  | Human herpesvirus 4         | EBNA-5        | 9.01E-25      | 3.04E-06       |
| <i>HLA-DQA1</i>  | 6    | 32631077 | 0.17   | Human adenovirus B          | L2            | 3.49E-18      | 0.0116         |
| <i>HLA-DQA1</i>  | 6    | 32632705 | 0.484  | Rhinovirus A                | Polyprotein   | 1.01E-12      | -              |
| <i>HLA-DQA1</i>  | 6    | 32635459 | 0.232  | Enterovirus C               | Polyprotein   | 6.06E-12      | 0.0811         |
| <i>HLA-DQA1</i>  | 6    | 32644109 | 0.244  | Human herpesvirus 1         | US11          | 2.12E-13      | 4.53E-07       |

|                     |    |           |        |                                   |                     |          |        |
|---------------------|----|-----------|--------|-----------------------------------|---------------------|----------|--------|
| <i>HLA-DQB1</i>     | 6  | 32686015  | 0.0657 | Human immunodeficiency virus 1    | gag-pol             | 3.93E-19 | 0.0312 |
| <i>ADAM6</i>        | 14 | 105975087 | 0.109  | Rhinovirus A                      | Polyprotein         | 1.56E-13 | -      |
| <i>ADAM6</i>        | 14 | 105975555 | 0.393  | Human coronavirus NL63            | N_6                 | 1.47E-16 | -      |
| <i>IGHV1-2</i>      | 14 | 105986730 | 0.144  | Human herpesvirus 4               | BPLF1               | 1.36E-14 | -      |
| <i>IGHVIII-2-1</i>  | 14 | 105999331 | 0.129  | Hepatitis B virus                 | Mutant core protein | 9.23E-24 | -      |
| <i>IGHVIII-2-1</i>  | 14 | 105999331 | 0.129  | Human herpesvirus 3               | Polyprotein         | 2.84E-12 | -      |
| <i>IGHVIII-2-1</i>  | 14 | 106002152 | 0.141  | Human respiratory syncytial virus | G                   | 1.46E-22 | -      |
| <i>IGHV4-4</i>      | 14 | 106010489 | 0.381  | Human herpesvirus 2               | UL36                | 3.40E-17 | -      |
| <i>IGHV4-4</i>      | 14 | 106010489 | 0.381  | Human herpesvirus 5               | TRS1                | 1.59E-14 | -      |
| <i>IGHV4-4</i>      | 14 | 106016678 | 0.377  | Alphapapillomavirus 11            | L2                  | 1.37E-12 | -      |
| <i>IGHV4-4</i>      | 14 | 106016678 | 0.377  | Human immunodeficiency virus 1    | gag-pol             | 1.03E-24 | -      |
| <i>IGHV7-4-1</i>    | 14 | 106030786 | 0.31   | Enterovirus B                     | Polyprotein         | 2.02E-17 | -      |
| <i>IGHV7-4-1</i>    | 14 | 106030786 | 0.31   | Enterovirus C                     | Polyprotein         | 6.40E-21 | -      |
| <i>IGHV7-4-1</i>    | 14 | 106030786 | 0.31   | Rhinovirus B                      | Polyprotein         | 1.64E-13 | -      |
| <i>IGHV2-5</i>      | 14 | 106038037 | 0.339  | Variola virus                     | A42R_A45R_A47R_A50R | 5.43E-11 | -      |
| <i>IGHVIII-11-1</i> | 14 | 106118812 | 0.406  | Macacine herpesvirus 1            | gE_US8              | 1.46E-16 | -      |
| <i>IGHV3-13</i>     | 14 | 106127116 | 0.402  | Powassan virus                    | Polyprotein         | 1.95E-19 | -      |
| <i>IGHVII-15-1</i>  | 14 | 106164409 | 0.114  | Human herpesvirus 6A              | U47_RF3_RF4         | 6.94E-16 | -      |
| <i>IGHVII-15-1</i>  | 14 | 106164409 | 0.114  | Human herpesvirus 6B              | U47_KA8L            | 1.23E-14 | -      |
| <i>IGHVIII-47-1</i> | 14 | 106532442 | 0.0549 | Influenza A virus                 | M1                  | 2.20E-13 | -      |

|                 |    |           |       |                              |                                    |          |          |
|-----------------|----|-----------|-------|------------------------------|------------------------------------|----------|----------|
| <i>IGHV3-64</i> | 14 | 106657835 | 0.369 | Sandfly fever Sicilian virus | N                                  | 5.11E-12 | 0.0129   |
| <i>IGHV3-65</i> | 14 | 106663911 | 0.369 | Rubella virus                | Large tegument protein deneddylase | 3.80E-15 | 0.142    |
| <i>FUT2</i>     | 19 | 48700572  | 0.429 | Salivirus A                  | PV                                 | 1.58E-14 | 0.00178  |
| <i>FUT2</i>     | 19 | 48702851  | 0.44  | Salivirus FHB                | Polyprotein                        | 4.74E-13 | 1.36E-10 |
| <i>FUT2</i>     | 19 | 48703346  | 0.498 | Norwalk virus                | Polyprotein                        | 1.10E-10 | 0.0407   |

**Table 1. Genome-wide significant associations between human genetic variants and the antibody repertoire.** Only the most significant variant within a 1-Mb window centered on genome-wide significance hits is shown for each associated virus.

**Supplementary Table 1.** Performance statistics for models predicting serostatus using VirScan peptide *Z*-scores

**Supplementary Table 2.** Demographic and lifestyle variables examined

**Supplementary Table 3.** *P*-values for the associations between demographic variables and 2,608 public peptide *Z*-scores

**Supplementary Table 4.** Association statistics between all genome-wide significant GWAS hits and 2,608 public peptide *Z*-scores

**Supplementary Table 5.** Association statistics for all significant *HLA* alleles

## Online Methods

### The Milieu Intérieur cohort

The Milieu Intérieur (MI) cohort comprises 1,000 healthy adults recruited to investigate genetic and non-genetic determinants of immune response variation<sup>32</sup>. Recruitment was conducted in Rennes (France) in 2012-2013, and individuals were selected based on a large set of relatively strict inclusion and exclusion criteria described elsewhere<sup>32</sup>. Of the 900 individuals reported in the present study, 453 are female, and 447 are male, ranging from 20 to 69 years of age. The study has been approved by the *Comité de Protection des Personnes — Ouest 6* (Committee for the Protection of Persons) and by the French *Agence Nationale de Sécurité du Médicament* (ANSM). The study protocol, including inclusion and exclusion criteria for the Milieu Intérieur study, has been registered on ClinicalTrials.gov under the study ID NCT01699893.

### The EvoImmunoPop cohort

The EvoImmunoPop (EIP) cohort comprises 390 healthy adults recruited to investigate human population differences in immune responses. Recruitment was conducted in Ghent (Belgium) in 2012-2013. Of the 312 individuals reported in the present study, 100 individuals reported to be of Central African descent (AFB, age range 20 to 50 years), and 212 reported to be of European descent (EUB, age range 20 to 50 years). All EUB were born in Europe, whereas >90% of AFB were born in Cameroon or the Democratic Republic of Congo. AFB and EUB present no evidence of recent genetic admixture with populations originating from another continent, besides two AFB donors who present 22% of Near Eastern and 25% of European ancestries, respectively<sup>33</sup>. All individuals were negative for serological tests against human immunodeficiency virus, hepatitis B, or hepatitis C. The study has been approved by the Ethics Committee of Ghent University, the Ethics Board of Institut Pasteur (EVOIMMUNOPOP-281297), and the French authorities CPP, CCITRS, and CNIL.

### VirScan experimental protocol

To investigate the virus-specific and viral peptide-specific antibody profiles in the plasma of MI and EIP samples, we employed PhIP-Seq using the VirScan V3 library, a pathogen-epitope scanning method based on bacteriophage display and immuno-precipitation. The detailed



protocol and VirScan library are described elsewhere<sup>27,29,65</sup>. Briefly, a library of linear peptides of 56 amino acids each was constructed to cover all UniProt protein sequences of viruses known to infect humans. Peptides were staggered along each protein sequence with an overlap of 28 amino acids. The phage library was inactivated and incubated with plasma samples normalized to total IgG concentration and controls (bead samples) to form IgG-phage immunocomplexes. The immunocomplexes were then captured by magnetic beads, lysed, and sent to next-generation sequencing. Two replicates were performed for each individual to assess reproducibility.

### **VirScan data preprocessing**

Sequencing reads were processed as in ref.<sup>28</sup>, with some modifications. We utilized the bowtie2-samtools pipeline<sup>66,67</sup> to map the sequencing reads of each sample to the bacteriophage library and count the number of reads for each viral peptide. Subsequently, the positivity of each peptide in plasma samples was determined by a binning strategy where read counts from blank controls were first used to group the peptides into hundreds of bins so that the counts form a uniform distribution within each bin. Then, the peptides from plasma samples were allocated into the pre-defined bins. *Z*-scores were calculated for each peptide from each plasma sample. The means and standard deviations used for the *Z*-score calculations were the same for each bin and were computed using the bead control sample read counts for the peptides belonging to that bin. After generating a matrix of 115,753 peptide *Z*-scores for 900 MI or 312 EIP samples, we discarded peptides from bacteria, fungi, and allergens from the VirScan library, resulting in 99,460 viral peptides. *Z*-score values were inverse hyperbolic sine- (arcsinh)-transformed in each sample. Contrarily to log transformation, the arcsinh function is convenient to handle both over-dispersion due to outliers and zero values, which were common in the VirScan *Z*-score data.

Outlier peptides were identified by leveraging replicates through the following process. First, *Z*-score values missing in only one replicate were set to NA in both replicates. Then, outliers in each replicate were defined as *Z*-scores higher than the 99.5% quantile. Next, the absolute difference in *Z*-scores between replicates was calculated for all peptides with an outlier value in at least one replicate. The distribution of absolute differences was bimodal, with the lower peak representing consistent *Z*-scores between replicates and the upper peak representing inconsistent *Z*-scores. The local minimum between the peaks was identified using the optimize function from the *stats* R package, and outliers were defined as all peptides with absolute differences above this

minimum. The Z-score values of both replicates for all outlier peptides were then set to NA. The rate of missing values was 1.06% in the MI cohort and 1.09% in the EIP cohort. Next, peptides with >50% missing values were removed from the dataset, leaving 98,757 in the MI dataset and 98,697 in the EIP dataset. Duplicated Uniprot entries were removed, leaving 97,975 peptides in the MI dataset and 97,923 in the EIP dataset for the remaining analyses.

Missing values were imputed by first running a PCA on all Z-scores using the `pca` function from the *pcaMethods* package (`nPcs = 10`, `scale = 'uv'`), followed by imputation using the `completeObs` function from the same package. As individual samples were processed in batches on cell culture plates, samples were batch-corrected using the `ComBat`<sup>68</sup> function from the *sva* R package, using plates as the batch variable. The final Z-scores were generated by calculating the mean of the two replicates for each individual. A peptide was considered significantly positive if the Z-scores of both replicates were >3.5. The hit variable was defined as 1 if the peptide was positive and 0 otherwise. To generate the list of public peptides, the datasets were filtered on peptides significantly positive in >5% of tested individuals for at least 2 peptides per virus.

### **VirScan data processing with AVARDA**

Between-species antibody cross-reactivity, unequal representation of viruses in the VirScan library, and viral genome size can make peptide-level data challenging to interpret in some cases. To address these limitations and compare antibody profiles at the virus-species level, we applied the AVARDA algorithm as previously described<sup>34</sup>, using the code available at <https://github.com/drmonaco/AVARDA>. Briefly, individual VirScan peptides were aligned to each other and to a master library of all viral genetic sequences translated in all reading frames using BLAST. 'Evidence peptides' were VirScan peptides that align to the master library with a bit score >80. For each virus, AVARDA calculated a maximally independent set of unrelated peptides that explains the total reactivity towards this virus. A 'probability of infection' for each virus was calculated using binomial testing, comparing the ratio of the number of positive evidence peptides to the total number of evidence peptides with the fractional representation of the virus in the VirScan library. Finally, cross-reactivity was evaluated by ranking all viruses based on the probability of infection. Pairs of viruses were then iteratively compared, where shared reactive peptides were assigned to the virus with the most substantial evidence of infection based solely on non-shared peptides. Once all peptides were exclusively assigned to a

single virus, a final probability of infection for each sample was calculated using the binomial testing procedure described above. Additionally, a breadth score was calculated, reflecting the total number of positive peptides of independent specificity for each virus.

### **Immunoassay-based serological data**

Details on the specific antigens and immunoassay methods have been previously described<sup>2</sup>. Blood was collected in EDTA-treated tubes, and the plasma was extracted by centrifugation. Total levels of immunoglobulins IgG, IgM, IgE, and IgA were measured with a turbidimetric test on an Olympus AU400 Chemistry Analyzer. The immunoassay-based serologies were measured for IgG against the following viruses and antigens: CMV (viral lysate), HSV-1 (Glycoprotein G), HSV-2 (Glycoprotein G2), EBV (EBNA-1, VCA p18, EA-D), VZV (Lysate), IAV (Lysate), rubella (Lysate), and measles (Lysate). The data processing steps for the immunoassay-based serology data are described in more detail in ref.<sup>2</sup>. Briefly, the absorbance and emission values collected in each assay are used to call the serostatus for each blood sample. The individual cutoff values used for calling a sample positive or negative are given by the manufacturer and can be found in Table S2 of ref.<sup>2</sup>.

### **Luminex-based serological data**

MI plasma samples were tested for antibodies to a broad panel of common respiratory pathogens and routine vaccine-preventable diseases using bead-based multiplex assays. A 43-plex assay was developed that included antigens for adenovirus, cytomegalovirus, Epstein-Barr virus, echovirus, enterovirus CoxB3, hepatitis A virus, hepatitis B virus, hepatitis C virus, measles, mumps, rubella, norovirus, respiratory syncytial virus (RSV), rhinovirus, rotavirus, varicella-zoster virus, human papillomavirus, influenza A, human seasonal coronaviruses 229E, NL63, OC43 and HKU1, and SARS-CoV-2. Three antigens for RSV were sourced from The Native Antigen Company (Oxford, UK): RSV A glycoprotein G (RSV-AgG); RSV A lysate (RSV-A); and RSV B lysate (RSV-B). Samples were run at a dilution of 1:100. Plates were read using a Luminex IntelliFlex system, and the median fluorescence intensity was used for analysis. For the Luminex-based serology data, a 5-parameter logistic curve was used to convert median fluorescence intensities to relative antibody units, relative to the standard curve performed on the same plate to account for inter-assay variation.

## **Serostatus prediction**

We assessed the performance of different methods that predict serostatus from the VirScan data by comparing predicted serostatus to ELISA-based serostatus obtained in the same 900 MI donors. We focused on predicting serostatus for four common viruses for which ELISA data were available: CMV, EBV (EBNA-1 and EA-D), HSV-1, and HSV-2 (Supplementary Note, Table S1). We considered four alternative approaches: (i) the hit-based heuristic method, which assigns seropositivity for a given virus when the number of hits is  $> 3$  or  $5$  (as in ref.<sup>27</sup>); (ii) the hit-based optimized method, where we searched for the number of positive hits for a given virus that maximizes prediction precision and recall; (iii) the AVARDA-based optimized method, where we searched for the threshold value of the AVARDA breadth score for a given virus maximizes prediction precision and recall, and (iv) an Elastic Net penalized Logistic Regression trained from a subset of the data.

To train the Elastic Net model, we shuffled and split the data into a training set (70% of the data) and a test set (30%) so that the ratio of seropositive to seronegative samples in both sets was the same as in the original data. We only considered VirScan peptide Z-scores for the tested virus as features during feature selection. Two complementary approaches were implemented to reduce overfitting: we discarded features with variance lower than a user-specified threshold, defining a first hyper-parameter, and kept the features with univariate association statistics higher than a user-specified percentile, defining a second hyper-parameter. A grid-based approach was used to optimize the two hyper-parameters and the ratio between Elastic Net L1 and L2 penalty, performing a 5-fold cross-validation for each point of the 3-dimensional grid. We visually inspected learning curves to ensure the absence of overfitting. Processing and modeling were carried out using Python 3.12.2 and the following packages numpy 1.26.4, scipy 1.12.0, pandas 2.2.1 and scikit-learn 1.4.1.post1. All the packages were installed in a conda 24.3.0 environment for reproducibility.

## **Kappa-deleting recombination excision circles (KREC) assay**

To evaluate if B-cell maturation affects antibody levels, we tested the association between all public peptide Z-scores and circulating levels of Kappa-deleting recombination excision circles (KREC), i.e., circular DNA segments generated in B cells during their maturation in bone

marrow. KRECs serve as surrogates of new B cell output, as they persist in B cells and get diluted with cell division<sup>69</sup>. KREC quantification was performed as in ref.<sup>70</sup>, with some modifications. Briefly, 1 to 2 µg of whole blood genomic DNA was pre-amplified for 3 minutes at 95°C and then 18 cycles of 95°C for 15 s, 60°C for 30 s and 68°C for 30 s, in a 50 µl reaction containing primers, 200 µM of each dNTP, 2.5 mM MgSO<sub>4</sub> and 1.25 unit of Platinum Taq DNA pol High Fidelity (ThermoFisher Scientific, Courtaboeuf, France) in 1× buffer. Forward and reverse primers were TCAGCGCCATTACGTTTCT and GTGAGGGACACGCAGCC for sjKREC, and CCCGATTAATGCTGCCGTAG and CCTAGGGAGCAGGGAGGCTT for cjKREC, respectively. Probes were CCAGCTCTTACCCTAGAGTTTCTGCACGG (sjKREC) and AGCTGCATTTTTGCCATATCCACTATTTGGAGTA (cjKREC). Columns of 48.48 Dynamic array IFCs (Fluidigm France, Paris, France) were loaded with 5 µl containing 2.25 µl of a 1/2000th dilution of preamplified DNA, 2.5 µl of 2× Takyon Low Rox Probe MM (Eurogentec, Paris, France) and 0.25 µl of sample Loading Reagent and rows with an equal mixture of 2× Assay loading Reagent and 2× Assay Biomark containing only the two primers and the probe specific for each assay and were subjected to a 40 cycles PCR (95°C, 15 s and 60°C, 60 s) in a Biomark HD system (Fluidigm). cjKRECs and sjKRECs were normalized to 150,000 cells using the Albumin gene quantification.

### **Genome-wide SNP genotyping**

Details about SNP array genotyping of the MI cohort are available elsewhere<sup>45</sup>. Briefly, DNA was extracted from whole blood collected on EDTA using the Nucleon BACC3 genomic DNA extraction kit (catalog #: RPN8512; Cytiva, Massachusetts, USA). The 1,000 MI individuals were genotyped using the HumanOmniExpress-24 BeadChip (Illumina, U.S.), and 966 were also genotyped using the HumanExome-12 BeadChip (Illumina, U.S.). Details about SNP array genotyping of the EIP cohort are available elsewhere<sup>33</sup>. Briefly, PBMCs were isolated from blood collected into EDTA vacutainers, monocytes were removed with CD14+ microbeads, and DNA was isolated from the monocyte-negative fraction using a standard phenol/chloroform protocol, followed by ethanol precipitation. Genotyping was performed in all individuals using the HumanOmni5-Quad BeadChip (Illumina, U.S.) In addition, whole-exome sequencing was performed with the Nextera Rapid Capture Expanded Exome kit.

The genotyping data processing of the MI cohort is described in detail in ref.<sup>45</sup>. After applying quality control filters, the SNP array data sets from the two genotyping platforms were merged. SNPs that were discordant in genotypes or position between the two platforms were removed, yielding a final data set containing 732,341 genotyped SNPs. The data set was then phased using SHAPEIT2<sup>71</sup> and imputed using IMPUTE v.2<sup>72</sup>, with 1-Mb windows and a buffer region of 1Mb. After imputation, SNPs with an information metric  $\leq 0.8$ , duplicated SNPs, SNPs with a missingness of  $>5\%$ , and SNPs with a minor allele frequency of  $\leq 5\%$  were removed, generating a final data set of 5,699,237 SNPs. 13 individuals were removed based on relatedness and admixture<sup>45</sup>. Finally, the data set was converted to GRCh38 using the *LiftoverVcf* function from the *GATK* software package<sup>73</sup>.

A more complete description of the genotyping EIP data processing steps can be found in ref<sup>33</sup>. The SNP array genotyping and whole-exome sequencing data were processed separately and merged. For the SNP array data, SNPs were passed through multiple QC filters, and SNPs originating from the sex chromosomes were removed. For the whole-exome sequencing data, reads were processed according to the GATK Best Practices. Discordant variants between the two datasets were removed before merging the SNP array and whole-exome sequencing data sets. After combining the two datasets, the data was phased using SHAPEIT2 and imputed using IMPUTE v.2, with 1-Mb windows and a buffer region of 1 Mb. After imputation and additional QC filtering, 19,619,457 SNPs remained. The data set was converted to GRCh38 using the *LiftoverVcf* function from the *GATK* software package<sup>73</sup>. Finally, four individuals were removed based on relatedness and admixture<sup>33</sup>.

### **Whole-genome sequencing**

Whole genome sequencing was performed by the Centre National de Recherche en Génomique Humaine (CNRGH), Institut de Biologie François Jacob, Evry, France. After quality control, 1 $\mu$ g of genomic DNA was used to prepare a library using the Illumina TruSeq DNA PCR-Free Library Preparation Kit, according to the manufacturer's instructions. After normalization and quality control, qualified libraries were sequenced on an Illumina HiSeqX5 platform (Illumina Inc., CA, USA) as paired-end 150 bp reads. One lane of HiSeqX5 flow cell was produced for each sample to reach an average sequencing depth of  $\sim 30\times$  for each sample. FASTQ files were mapped on the human reference genome version hs37d5, using BWA-MEM with default

options<sup>74</sup>. BAM file integrity was verified with PicardTools and samtools. Duplicated reads were identified with sambamba<sup>75</sup>. Reads were realigned and recalibrated with GATK<sup>73</sup> v.4.1. Sequencing reads mapping to the *HLA*, *IGH*, *IGK*, and *IGL* loci were extracted from the mapped BAM files. Genotypes were called in each individual with HaplotypeCaller in GVCF mode. Multi-sample genotype calling was performed jointly on combined GVCF files with GATK GenotypeGVCFs. After Variant Quality Score Recalibration (VQSR), variants that passed the tranche sensitivity threshold of 99.0% were selected. Multiallelic sites were split into several biallelic sites with ‘bcftools norm -m-both’ and variants spanning deletions were filtered out. Genotypes were set to missing if the depth of coverage was  $< 8\times$  or genotype quality  $< 20$ . Based on kinship coefficients estimated with KING<sup>76</sup>, ten related individuals and one individual detected as contaminated were excluded. Finally, variants with minor allele frequency (MAF)  $< 0.05$ , Hardy-Weinberg equilibrium  $P$ -value  $< 10^{-10}$  (calculated using the *HWEexact* function from the *GWASexactHW* R package) or call rate  $< 0.95$  were discarded, resulting in a total of 30,503 common variants near and within immunoglobulin genes.

### **Testing association between VirScan Z-scores and non-genetic factors**

All statistical associations were tested using multiple regression models. In all models, the dependent variable was either an asinh-transformed VirScan Z-score (for a given peptide) or an AVARDA breadth score (for a given virus). The independent variable could be (i) serological measurements based on ELISA, (ii) serological measurements based on Luminex xMAP assays, or (iii) age and sex, continent of birth, and candidate non-genetic factors, including smoking, diet, past diseases, health biomarkers, and anthropometric measures (Table S2). The three variable groups (i), (ii), and (iii) were treated as independent families of tests. Tests within the MI and EIP cohorts were also considered independent. As detailed below, the specific model and complete list of covariates used varied depending on the independent variables being tested.

A linear model was applied using the 'lm' R function when the independent variable was continuous or binary. The beta value was used to determine the effect size of the independent variable. When the independent variable was categorical with more than two levels, an ANCOVA model was applied using the 'aov' R function. In the association analyses of the MI cohort, age and sex were systematically included as covariates. We also investigated non-linear effects of age by testing an ANOVA model that models age as a factor with five 10-year levels.

In addition, we tested for age×sex interactions by adding an interaction term to the linear model. The only analyzed independent variables for the EIP cohort were age and continent of birth. When age was used as the variable of interest, the continent of birth was controlled for, and vice versa. As all individuals in the EIP cohort were males, sex was not used as a covariate in these analyses.

To leverage the high resolution of the VirScan peptide library while accounting for between-species antibody cross-reactivity, we first tested the association between non-genetic factors and all public peptide Z-scores and then evaluated if AVARDA breadth scores for the tested viruses were associated with the corresponding factors. We considered three scenarios: (i) both the Z-scores for several peptides of a given virus and the AVARDA score for the same virus were associated with the candidate factor in the same direction, interpreted as a true association; (ii) the Z-scores for several peptides of a given virus were associated with the candidate factor in the same direction, but the AVARDA score for the same virus was not, interpreted as a false association due to cross-reactivity; and (iii) the Z-scores for several peptides of a given virus were associated with the candidate factor in opposite directions, but the AVARDA score for the same virus was not associated, interpreted as true associations obscured by opposite epitope-specific effects.

### **Testing association between VirScan scores and genetic factors**

GWAS was conducted on the asinh-transformed VirScan Z-scores or AVARDA breadth scores in the MI cohort. The EIP cohort was used as a replication cohort. The specific covariates used differed between the two cohorts. To correct for population stratification, a principal component analysis was run on all SNPs separately for both cohorts, and the first two principal components were included as covariates. Age was also included as a covariate for both cohorts, and sex was included as a covariate for the MI cohort only. The population of origin was included as an additional binary indicator covariate for the EIP cohort. The GWAS analyses were conducted using the 'assocRegression' function from the *GWASTools* R package<sup>77</sup>, using a linear model as the model type and an additive model for the genotype effects. Manhattan plots, locusZoom plots, and tables were all made using the *topr* R package<sup>78</sup>.

### **HLA allele imputation and association testing**



*HLA* allele imputation was done using whole-genome sequencing data of the *HLA* locus (here defined as position 28-35 Mbp in GRCh37), using all variants in the region with  $MAF \geq 5\%$ . Imputation was conducted on the Michigan Imputation Server<sup>79</sup>, using the Four-digit Multi-ethnic *HLA* reference panel v2. *HLA* dosages were calculated using plink2<sup>80</sup>. Association testing was conducted similarly to individual SNP analysis but using *HLA* allele dosages instead of SNP genotypes.

### **Estimation of the proportion of variance explained**

The proportion of variance explained by demographic and genetic factors was estimated for the VirScan Z-scores of the 2,608 public peptides in the MI cohort. Genetic factors were the most associated SNPs identified through conditional GWAS, i.e., by testing association with all variants while controlling for hitherto identified lead SNPs. This process was continued until no more SNPs with a *P*-value below genome-wide significance ( $P < 1.31 \times 10^{-10}$ ) could be identified, leaving a total of 17 SNPs. Age, sex, and smoking were included as demographic factors. The contribution of each of these 20 variables to the variance of each peptide Z-score was estimated using the *relaimpo* R package<sup>81</sup>.

### **Phylogenetic analyses**

All UniProt amino-acid sequences used to build the VirScan peptide library for the RSV protein G were aligned with the *msa* function from the *msa* package<sup>82</sup>. The 41-aa-long region that was covered by the largest number of UniProt sequences was identified. Based on this shared region, a distance matrix between all Uniprot sequences was computed with the 'DistanceMatrix' function from the DECIPHER package<sup>83</sup>, and complete-linkage clustering was used to obtain a phylogenetic tree using the 'hclust' R function. Strain annotations were then interpolated for all VirScan peptides using the constructed tree.

## Data availability

The VirScan3 PhIP-seq raw and processed data generated in this study have been deposited in the Institut Pasteur data repository, OWEY, which can be accessed via the following link: <https://dataset.owey.io/doi/10.48802/owey.84rn-jg72?version=1.1>. All association statistics obtained in this study can be explored and downloaded from the web browser <http://mirepertoire.pasteur.cloud/>. The SNP array data can be accessed in the European Genome-Phenome Archive (EGA) with the accession code EGAS00001002460. All Milieu Intérieur datasets can be accessed by submitting a data access request to [milieuinterieurdac@pasteur.fr](mailto:milieuinterieurdac@pasteur.fr), the Milieu Intérieur data access committee (DAC). The DAC informs all the research participants of the data access request and grants data access if the request is consistent with the informed consent signed by the participants. In particular, research on Milieu Intérieur datasets is restricted to research on the genetic and environmental determinants of human variation in immune responses. Data access is typically granted two months after request submission.

## References

1. Mentzer, A. J. *et al.* Identification of host–pathogen-disease relationships using a scalable multiplex serology platform in UK Biobank. *Nat Commun* **13**, 1818 (2022).
2. Scepanovic, P. *et al.* Human genetic variants and age are the strongest predictors of humoral immune responses to common pathogens and vaccines. *Genome Med* **10**, 59 (2018).
3. Flanagan, K. L., Fink, A. L., Plebanski, M. & Klein, S. L. Sex and Gender Differences in the Outcomes of Vaccination over the Life Course. *Ann Rev Cell Dev Biol* **33**, 577–599 (2017).
4. Andreu-Sánchez, S. *et al.* Phage display sequencing reveals that genetic, environmental, and intrinsic factors influence variation of human antibody epitope repertoire. *Immunity* **56**, 1376-1392 (2023).
5. Bourgonje, A. R. *et al.* Phage-display immunoprecipitation sequencing of the antibody epitope repertoire in inflammatory bowel disease reveals distinct antibody signatures. *Immunity* **56**, 1393-1409 (2023).
6. Rubicz, R. *et al.* Genome-wide genetic investigation of serological measures of common infections. *Eur J Hum Genet* **23**, 1544–1548 (2015).
7. Granada, M. *et al.* A genome-wide association study of plasma total IgE concentrations in the Framingham Heart Study. *J Allergy Clin Immunol* **129**, 840-845.e21 (2012).
8. Jonsson, S. *et al.* Identification of sequence variants influencing immunoglobulin levels. *Nat Genet* **49**, 1182–1191 (2017).
9. Rubicz, R. *et al.* Genetic Factors Influence Serological Measures of Common Infections. *Hum Hered* **72**, 133–141 (2011).
10. Hammer, C. *et al.* Amino Acid Variation in HLA Class II Proteins Is a Major Determinant of Humoral Response to Common Viruses. *Am J Hum Genet* **97**, 738–743 (2015).

11. Kachuri, L. *et al.* The landscape of host genetic factors involved in immune response to common viral infections. *Genome Med* **12**, 93 (2020).
12. Tian, C. *et al.* Genome-wide association and HLA region fine-mapping studies identify susceptibility loci for multiple common infections. *Nat Commun* **8**, 599 (2017).
13. Png, E. *et al.* A genome-wide association study of hepatitis B vaccine response in an Indonesian population reveals multiple independent risk variants in the *HLA* region. *Hum Mol Genet* **20**, 3893–3898 (2011).
14. Rubicz, R. *et al.* A Genome-Wide Integrative Genomic Study Localizes Genetic Factors Influencing Antibodies against Epstein-Barr Virus Nuclear Antigen 1 (EBNA-1). *PLoS Genet* **9**, e1003147 (2013).
15. Venkataraman, T. *et al.* Analysis of antibody binding specificities in twin and SNP-genotyped cohorts reveals that antiviral antibody epitope selection is a heritable trait. *Immunity* **55**, 174-184 (2022).
16. Pedergnana, V. *et al.* Combined linkage and association studies show that HLA class II variants control levels of antibodies against Epstein-Barr virus antigens. *PLoS One* **9**, e102501 (2014).
17. Hodel, F. *et al.* Human genomics of the humoral immune response against polyomaviruses. *Virus Evolution* **7**, veab058 (2021).
18. Liang, G. & Bushman, F. D. The human virome: assembly, composition and host interactions. *Nat Rev Microbiol* **19**, 514–527 (2021).
19. Chang, S. P. *et al.* Shift in epitope dominance of IgM and IgG responses to *Plasmodium falciparum* MSP1 block 4. *Malaria J* **9**, 14 (2010).

20. Smith, M. *et al.* Age, Disease Severity and Ethnicity Influence Humoral Responses in a Multi-Ethnic COVID-19 Cohort. *Viruses* **13**, 786 (2021).
21. Larman, H. B. *et al.* Autoantigen discovery with a synthetic human peptidome. *Nat Biotechnol* **29**, 535–541 (2011).
22. Larman, H. B. *et al.* PhIP-Seq characterization of autoantibodies from patients with multiple sclerosis, type 1 diabetes and rheumatoid arthritis. *J Autoimmun* **43**, 1–9 (2013).
23. Shrock, E. *et al.* Viral epitope profiling of COVID-19 patients reveals cross-reactivity and correlates of severity. *Science* **370**, eabd4250 (2020).
24. Angkeow, J. W. *et al.* Phage display of environmental protein toxins and virulence factors reveals the prevalence, persistence, and genetics of antibody responses. *Immunity* **55**, 1051-1066.e4 (2022).
25. Leviatan, S. *et al.* Allergenic food protein consumption is associated with systemic IgG antibody responses in non-allergic individuals. *Immunity* **55**, 2454-2469.e6 (2022).
26. Vogl, T. *et al.* Population-wide diversity and stability of serum antibody epitope repertoires against human microbiota. *Nat Med* **27**, 1442–1450 (2021).
27. Xu, G. J. *et al.* Comprehensive serological profiling of human populations using a synthetic human virome. *Science* **348**, aaa0698 (2015).
28. Mina, M. J. *et al.* Measles virus infection diminishes preexisting antibodies that offer protection from other pathogens. *Science* **366**, 599–606 (2019).
29. Pou, C. *et al.* The repertoire of maternal anti-viral antibodies in human newborns. *Nat Med* **25**, 591–596 (2019).
30. Shrock, E. L. *et al.* Germline-encoded amino acid-binding motifs drive immunodominant public antibody responses. *Science* **380**, eadc9498 (2023).

31. Bennett, S. J. *et al.* Antibody epitope profiling of the KSHV LANA protein using VirScan. *PLOS Pathog* **18**, e1011033 (2022).
32. Thomas, S. *et al.* The Milieu Intérieur study - An integrative approach for study of human immunological variance. *Clin Immunol* **157**, 277–293 (2015).
33. Quach, H. *et al.* Genetic Adaptation and Neandertal Admixture Shaped the Immune System of Human Populations. *Cell* **167**, 643-656.e17 (2016).
34. Monaco, D. R. *et al.* Deconvoluting virome-wide antibody epitope reactivity profiles. *EBioMedicine* **75**, 103747 (2022).
35. Grinde, B. Herpesviruses: latency and reactivation - viral strategies and host response. *J Oral Microbiol* **5** (2013).
36. Goyer, M., Aho, L.-S., Bour, J.-B., Ambert-Balay, K. & Pothier, P. Seroprevalence distribution of Aichi virus among a French population in 2006–2007. *Arch Virol* **153**, 1171–1174 (2008).
37. Rivadulla, E. & Romalde, J. L. A Comprehensive Review on Human Aichi Virus. *Virol. Sin.* **35**, 501–516 (2020).
38. Knossow, M. & Skehel, J. J. Variation and infectivity neutralization in influenza. *Immunol* **119**, 1–7 (2006).
39. Aquino, Y. *et al.* Dissecting human population variation in single-cell responses to SARS-CoV-2. *Nature* **621**, 120–128 (2023).
40. Chatlynne, L. G. & Ablashi, D. V. Seroepidemiology of Kaposi's sarcoma-associated herpesvirus (KSHV). *Sem Cancer Biol* **9**, 175–185 (1999).
41. Zuhair, M. *et al.* Estimation of the worldwide seroprevalence of cytomegalovirus: A systematic review and meta-analysis. *Rev Medical Virol* **29**, e2034 (2019).

42. Palser, A. L. *et al.* Genome diversity of Epstein-Barr virus from multiple tumor types and normal infection. *J Virol* **89**, 5222–5237 (2015).
43. Cohen, S., Tyrrell, D. A., Russell, M. A., Jarvis, M. J. & Smith, A. P. Smoking, alcohol consumption, and susceptibility to the common cold. *Am J Public Health* **83**, 1277–1283 (1993).
44. Kang, M.-J. *et al.* Cigarette smoke selectively enhances viral PAMP- and virus-induced pulmonary innate immune and remodeling responses in mice. *J Clin Invest* **118**, 2771–2784 (2008).
45. Patin, E. *et al.* Natural variation in the parameters of innate immune cells is preferentially driven by genetic factors. *Nat Immunol* **19**, 302–314 (2018).
46. Kurki, M. I. *et al.* FinnGen provides genetic insights from a well-phenotyped isolated population. *Nature* **613**, 508–518 (2023).
47. Balandraud, N. & Roudier, J. Epstein-Barr virus and rheumatoid arthritis. *Joint Bone Spine* **85**, 165–170 (2018).
48. Kagnoff, M. F., Austin, R. K., Hubert, J. J., Bernardin, J. E. & Kasarda, D. D. Possible role for a human adenovirus in the pathogenesis of celiac disease. *J Exp Med* **160**, 1544–1557 (1984).
49. Vehik, K. *et al.* Prospective virome analyses in young children at increased genetic risk for type 1 diabetes. *Nat Med* **25**, 1865–1872 (2019).
50. Le Pendu, J., Ruvoën-Clouet, N., Kindberg, E. & Svensson, L. Mendelian resistance to human norovirus infections. *Sem Immunol* **18**, 375–386 (2006).
51. Chiou, J. *et al.* Interpreting type 1 diabetes risk with genetics and single-cell epigenomics. *Nature* **594**, 398–402 (2021).

52. Jostins, L. *et al.* Host-microbe interactions have shaped the genetic architecture of inflammatory bowel disease. *Nature* **491**, 119–124 (2012).
53. Lindesmith, L. *et al.* Human susceptibility and resistance to Norwalk virus infection. *Nat Med* **9**, 548–553 (2003).
54. Reuter, G., Pankovics, P. & Boros, Á. Saliviruses—the first knowledge about a newly discovered human picornavirus. *Rev Medical Virol* **27**, e1904 (2017).
55. Rodriguez, O. L. *et al.* Genetic variation in the immunoglobulin heavy chain locus shapes the human antibody repertoire. *Nat Commun* **14**, 4419 (2023).
56. Avnir, Y. *et al.* IGHV1-69 polymorphism modulates anti-influenza antibody repertoires, correlates with IGHV utilization shifts and varies by ethnicity. *Sci Rep* **6**, 20842 (2016).
57. Kishko, M. *et al.* Evaluation of the respiratory syncytial virus G-directed neutralizing antibody response in the human airway epithelial cell model. *Virology* **550**, 21–26 (2020).
58. Melero, J. A. & Moore, M. L. Influence of Respiratory Syncytial Virus Strain Differences on Pathogenesis and Immunity. in *Challenges and Opportunities for Respiratory Syncytial Virus Vaccines* (eds. Anderson, L. J. & Graham, B. S.) 59–82 (Springer, Berlin, Heidelberg, 2013). doi:10.1007/978-3-642-38919-1\_3.
59. Fuentes, S., Coyle, E. M., Beeler, J., Golding, H. & Khurana, S. Antigenic Fingerprinting following Primary RSV Infection in Young Children Identifies Novel Antigenic Sites and Reveals Unlinked Evolution of Human Antibody Repertoires to Fusion and Attachment Glycoproteins. *PLOS Pathog* **12**, e1005554 (2016).
60. Nachbagauer, R. *et al.* Age Dependence and Isotype Specificity of Influenza Virus Hemagglutinin Stalk-Reactive Antibodies in Humans. *mBio* **7**, 10.1128/mbio.01996-15 (2016).



61. Miller, M. S. *et al.* Neutralizing Antibodies Against Previously Encountered Influenza Virus Strains Increase over Time: A Longitudinal Analysis. *Science Transl Med* **5**, 198ra107 (2013).
62. Liao, H.-M. *et al.* Epstein-Barr Virus in Burkitt Lymphoma in Africa Reveals a Limited Set of Whole Genome and LMP-1 Sequence Patterns: Analysis of Archival Datasets and Field Samples From Uganda, Tanzania, and Kenya. *Front Oncol* **12**, 812224 (2022).
63. Benton, M. L. *et al.* The influence of evolutionary history on human health and disease. *Nat Rev Genet* 1–15 (2021).
64. Kerner, G. *et al.* Genetic adaptation to pathogens and increased risk of inflammatory disorders in post-Neolithic Europe. *Cell Genom* **3**, 100248 (2023).
65. Consiglio, C. R. *et al.* The Immunology of Multisystem Inflammatory Syndrome in Children with COVID-19. *Cell* **183**, 968-981 (2020).
66. Langmead, B. & Salzberg, S. L. Fast gapped-read alignment with Bowtie 2. *Nat Methods* **9**, 357–359 (2012).
67. Danecek, P. *et al.* Twelve years of SAMtools and BCFtools. *Gigascience* **10**, giab008 (2021).
68. Johnson, W. E., Li, C. & Rabinovic, A. Adjusting batch effects in microarray expression data using empirical Bayes methods. *Biostatistics* **8**, 118–127 (2007).
69. van Zelm, M. C., Szczepanski, T., van der Burg, M. & van Dongen, J. J. M. Replication history of B lymphocytes reveals homeostatic proliferation and extensive antigen-induced B cell expansion. *J Exp Med* **204**, 645–655 (2007).
70. Glauzy, S. *et al.* Impact of acute and chronic graft-versus-host disease on human B-cell generation and replication. *Blood* **124**, 2459–2462 (2014).

71. Delaneau, O., Zagury, J.-F. & Marchini, J. Improved whole-chromosome phasing for disease and population genetic studies. *Nat Methods* **10**, 5–6 (2013).
72. Howie, B. N., Donnelly, P. & Marchini, J. A Flexible and Accurate Genotype Imputation Method for the Next Generation of Genome-Wide Association Studies. *PLOS Genet* **5**, e1000529 (2009).
73. Auwera, G. van der & O'Connor, B. D. *Genomics in the Cloud: Using Docker, GATK, and WDL in Terra*. (O'Reilly Media, Incorporated, 2020).
74. Li, H. & Durbin, R. Fast and accurate short read alignment with Burrows-Wheeler transform. *Bioinformatics* **25**, 1754–1760 (2009).
75. Tarasov, A., Vilella, A. J., Cuppen, E., Nijman, I. J. & Prins, P. Sambamba: fast processing of NGS alignment formats. *Bioinformatics* **31**, 2032–2034 (2015).
76. Manichaikul, A. *et al.* Robust relationship inference in genome-wide association studies. *Bioinformatics* **26**, 2867–2873 (2010).
77. Gogarten, S. M. *et al.* GWASTools: an R/Bioconductor package for quality control and analysis of genome-wide association studies. *Bioinformatics* **28**, 3329–3331 (2012).
78. Juliusdottir, T. topR: an R package for viewing and annotating genetic association results. *BMC Bioinformatics* **24**, 268 (2023).
79. Luo, Y. *et al.* A high-resolution HLA reference panel capturing global population diversity enables multi-ancestry fine-mapping in HIV host response. *Nat Genet* **53**, 1504–1516 (2021).
80. Chang, C. C. *et al.* Second-generation PLINK: rising to the challenge of larger and richer datasets. *Gigascience* **4**, 7 (2015).
81. Groemping, U. Relative Importance for Linear Regression in R: The Package relaimpo. *J Statistical Software* **17**, 1–27 (2007).

82. Bodenhofer, U., Bonatesta, E., Horejš-Kainrath, C. & Hochreiter, S. msa: an R package for multiple sequence alignment. *Bioinformatics* **31**, 3997–3999 (2015).
83. Wright, E., S. Using DECIPHER v2.0 to Analyze Big Biological Sequence Data in R. *The R Journal* **8**, 352 (2016).
